# Supplementary material for: A State of the Art on Emotions in the Context of Public Policymaking
Source: publisher site journal article supplement (doi:10.1515/spp-2025-0021), 2025-06-01
Supplement: Supplementary file 1 [file j_spp-2025-0021_suppl_001.docx]

**Appendix A:**

Table showing the journals that were included and excluded from the systematic review

| *Included journals* | *Excluded journals* |
| --- | --- |
| AMERICAN JOURNAL OF POLITICAL SCIENCE | ACTA POLITICA |
| AMERICAN POLITICAL SCIENCE REVIEW | AFRICAN AFFAIRS |
| ANNUAL REVIEW OF POLITICAL SCIENCE | AFRICAN JOURNAL OF CONFLICT RESOLUTOINS |
| BRITISH JOURNAL OF POLITICAL SCIENCE | AMERICAN POLITICS RESEARCH |
| COMPARATIVE EUROPEAN POLITICS | ANNALS OF THE AMERICAN ACADEMY OF POLITICAL AND SOCIAL SCIENCE |
| COMPARATIVE POLITICAL STUDIES | ARMED FORCES & SOCIETY |
| CONTEMPORARY POLITICAL THEORY | ASIAN POLITICS & POLICY |
| CONTEMPORARY POLITICS | AUSTRALIAN JOURNAL OF POLITICAL SCIENCE |
| CRITICAL POLICY STUDIES | AUSTRALIAN JOURNAL OF POLITICS AND HISTORY |
| EUROPEAN JOURNAL OF POLITICAL RESEARCH | BRITISH JOURNAL OF POLITICS & INTERNATIONAL RELATIONS |
| EUROPEAN POLICY ANALYSIS | BRITISH POLITICS |
| EUROPEAN POLITICAL SCIENCE REVIEW | CANADIAN JOURNAL OF POLITICAL SCIENCE-REVUE CANADIENNE DE SCIENCE POLITIQUE |
| INTERNATIONAL POLITICAL SCIENCE REVIEW | CAMBRIDGE REVIEW OF INTRNATIONAL AFFAIRS |
| J & MC QUARTERLY | CAPITAL AND CLASS |
| JOURNAL OF EUROPEAN PUBLIC POLICY | CITIZENSHIP STUDIES |
| JOURNAL OF POLICY HISTORY | COMMUNIST AND POST-COMMUNIST STUDIES |
| JOURNAL OF POLITICS | CONGRESS & THE PRESIDENCY-A JOURNAL OF CAPITAL STUDIES |
| JOURNAL OF PUBLIC POLICY | CONTEMPORARY SECURITY POLICY |
| POLICY AND POLITICS | COOPERATION AND CONFLICT |
| POLICY AND SOCIETY | CRITICAL REVIEW |
| Policy Sciences | CRITICAL REVIEW OF INTERNATIONAL SOCIAL AND POLITICAL PHILOSOPHY |
| POLICY STUDIES JOURNAL | CRITICIAL STUDIES ON TERRORISM |
| POLITICAL BEHAVIOR | DEMOCRACY& SECURITY |
| POLITICAL COMMUNICATION | DEMOCRATIZATION |
| POLITICAL PSYCHOLOGY | EAST ASIAN POLICY |
| POLITICAL STUDIES | EAST EUROPEAN POLITICS AND SOCIETY |
| POLITICS | ECONOMICS & POLITICS |
| POLITICS & POLICY | ELECTORAL STUDIES |
| POLITICS AND GOVERNANCE | ENVIRONEMNTAL POLITICS |
| PS-POLITICAL SCIENCE & POLITICS | ETHICS & GLOBAL POLITICS |
| PUBLIC OPINION QUARTERLY | EUROPEAN JOURNAL OF POLITICAL ECONOMY |
| RESEARCH & POLITICS | EUROPEAN JOURNAL OF POLITICAL THEORY |
| REVIEW OF POLICY RESEARCH | EUROPEAN JOURNAL OF POLITICS AND GENDER |
|  | EUROPEAN POLITICAL SCIENCE |
|  | EUROPEAN SECURITY |
|  | EUROPEAN UNION POLITICS |
|  | EUROPE-ASIA STUDIES |
|  | FORUM-A JOURNAL OF APPLIED RESEARCH IN CONTEMPORARY POLITICS |
|  | FRONTIERS IN POLITICAL SCIENCE |
|  | GEOPOLITICS |
|  | GERMAN POLITICS |
|  | GLOBAL DISCOURSE |
|  | GLOBAL ENVIRONMENTAL POLITICS |
|  | GLOBAL POLICY |
|  | GLOBAL PUBLIC POLICY AND GOVERNANCE |
|  | GLOBAL SOCIALM POLICY |
|  | GOVERNANCE-AN INTERNATIONAL JOURNAL OF POLICY ADMINISTRATION AND INSTITUTIONS |
|  | GOVERNANCE-AN INTERNATIONAL JOURNAL OF POLICY AND ADMINISTRATION |
|  | GOVERNMENT AND OPPOSITION |
|  | HARDVARD INTERNATIONAL JOURNAL OF PRESS-POLITICS |
|  | Innovation: The European Journal of Social Science Research |
|  | INTELLIGENCE AND NATIONAL SECURITY |
|  | INTEREST GROUPS & ADVOCACY |
|  | INTERNATIONAL FEMINIST JOURNAL OF POLITICS |
|  | INTERNATIONAL JOURNAL OF CONFLICT AND VIOLENCE |
|  | INTERNATIONAL JOURNAL OF CONFLICT MANAGEMENT |
|  | INTERNATIONAL JOURNAL OF POLITICS CULTURE AND SOCIETY |
|  | INTERNATIONAL JOURNAL OF PRESS-POLITICS |
|  | INTERNATIONAL JOURNAL OF PUBLIC OPINION RESEARCH |
|  | INTERNATIONAL JOURNAL OF TRANSITOINAL JUSTICE |
|  | INTERNATIONAL ORGANIZATION |
|  | INTERNATIONAL POLITICAL SOCIOLOGY |
|  | INTERNATIONAL POLITICS |
|  | INTERNATIONAL STUDIES QUARTERLY |
|  | INTERNATIONAL STUDIES REVIEW |
|  | INTERNATIONAL THEORY |
|  | INTERSECTOINS-EAST EUROPEAN JOURNAL OF SOCIETY AND POLITICS |
|  | ISSUES & STUDIES |
|  | ITALIAN POLITICAL SCIENCE REVIEW-RIVISTA ITALIANA DI SCIENZA POLITICA |
|  | JAPANESE JOURNAL OF POLITICAL SCIENCE |
|  | JCMS-JOURNAL OF COMMON MARKET STUDIES |
|  | JOURNAL OF CHINESE GOVERNANCE |
|  | JOURNAL OF CHINESE POLITICAL SCIENCE |
|  | JOURNAL OF COMPARATIVE POLITICS |
|  | JOURNAL OF CONFLICT RESOLUTION |
|  | JOURNAL OF CONTEMPORARY EUROPEAN STUDIES |
|  | JOURNAL OF ELECTIONS PUBLIC OPINION AND PARTIES |
|  | JOURNAL OF EUROPEAN INTEGRATION |
|  | JOURNAL OF EXPERIMENTAL POLITICAL SCIENCE |
|  | JOURNAL OF HUMAN RIGHTS PRACTICE |
|  | JOURNAL OF INFORMATION TECHNOLOGY & POLITICS |
|  | JOURNAL OF INTERNATIONAL POLITICAL THEORY |
|  | JOURNAL OF INTERNATIONAL RELATOINS AND DEVELOPMENT |
|  | JOURNAL OF PEACE RESEARCH |
|  | JOURNAL OF POLITICAL MARKETING |
|  | JOURNAL OF POLITICAL SCIENCE EDUCATION |
|  | JOURNAL OF PUBLIC ADMINISTRATION RESEARCH AND THEORY |
|  | JOURNAL OF RACE ETHNICITY AND POLITICS |
|  | JOURNAL OF STRATEGIC STUDIES |
|  | JOURNAL OF THEORETICAL POLITICS |
|  | JOURNAL OF WOMEN POLITICS & POLICY |
|  | LATIN AMERICAN PERSPECTIVES |
|  | LATIN AMERICAN POLICY |
|  | LATIN AMERICAN POLITICS AND SOCIETY |
|  | LEGISLATIVE STUDIES QUARTERLY |
|  | LOCAL GOVERNEMNT STUDIES |
|  | MEDITERRANEAN POLITICS |
|  | NATIONAL IDENTITIES |
|  | NATIONALITIES PAPERS-THE JOURNAL OF NATIONALISM AND ETHNICITY |
|  | NEW PERPSECTIVE |
|  | NEW POLITICAL ECONOMY |
|  | NORDIC JOURNAL OF HUMAN RIGHTS |
|  | OSTERREICHISCHE ZEITSCHRIFT FUR POLITIKWISSENSCHAFT |
|  | OSTEUROPA |
|  | PARLIAMENTARY AFFAIRS |
|  | PARTECIPAZIONE E CONFLITTO |
|  | PARTY POLITICS |
|  | PEACE ECONOMICS PEACE SCIENCE AND PUBLIC POLICY |
|  | PEACEBUILDING |
|  | Personality and Social Psychology Review |
|  | PERSEPCTIVES ON POLITICS |
|  | POLICY AND INTERNET |
|  | POLIS-POLITICHESKIYE ISSLEDOVANIYA |
|  | POLITEIA-JOURNAL OF POLITICAL TEHORY POLITICAL PHILOSOPHY AND SOCIOLOGY OF POLITICS |
|  | POLITICA Y GOBIERNO |
|  | POLITICAL GEOGRAPHY |
|  | POLITICAL QUARTERLY |
|  | POLITICAL RESEARCH EXCHANGE |
|  | POLITICAL RESEARCH QUARTERLY |
|  | POLITICAL SCIENCE |
|  | POLITICAL SCIENCE QUARTERLY |
|  | POLITICAL SCIENCE RESEARCH AND METHODS |
|  | POLITICAL STUDIES REVIEW |
|  | POLITICKE VEDY |
|  | POLITICS & GENDER |
|  | POLITICS AND RELIGION |
|  | POLITICS GROUPS AND IDENTITIES |
|  | POLITISCHE VIERTELJAHRESZEITSCHRIFT |
|  | POLITY |
|  | POPULISM |
|  | POST-SOVIET AFFAIRS |
|  | PRESIDENTIAL STUDIES QUARTERLY |
|  | ÜROBLEMS OF POST-COMMUNISM |
|  | PUBLIC ADMINISTRATION |
|  | PUBLIC ADMINISTRATION AND POLICY-AN ASIA PACIFIC JOURNAL |
|  | PUBLIUS-THE JOURNAL OF FEDERALISM |
|  | REGUALTION & GOVERNANCE |
|  | REVIEW OF ECONOMICS AND POLITICAL SCIENCE |
|  | REVIEW OF INTERNATIONAL ORGANIZATIONS |
|  | REVIEW OF INTERNATIONAL POLITICAL ECONOMY |
|  | REVISTA DE ESTUDIOS POLITICOS |
|  | REVISTA DEL CLAD REFORMA Y DEMOCRACIA |
|  | ROMANIAN JOURNAL OF POLITICAL SCIENCE |
|  | RUSI JOURNAL |
|  | SCANDINAVIAN POLITICAL STUDIES |
|  | SCOTTISH AFFAIRS |
|  | SOCIAL MOVEMENT STUDIES |
|  | SOCIAL SCIENCE QUARTERLY |
|  | SOCIO-ECONOMIC REVIEW |
|  | SOUTH EUROPEAN SOCIETY AND POLITICS |
|  | STATE POLITICS & POLICY QUARTERLY |
|  | STUDIES IN AMERICAN POLITICAL DEVELOPMENT |
|  | STUDIES IN CONFLICT & TERRORISM |
|  | STUDIES IN SOCIAL JUSTICE |
|  | SURVIVAL |
|  | SWISS POLITICAL SCIENCE REVIEW |
|  | TERRITORY POLITICS GOVERNANCE |
|  | TERRORISM AND POLITICAL VIOLENCE |
|  | THE SOCIOLOGICAL QUARTERLY |
|  | TURKISH POLICY QUARTERLY |
|  | WEST EUROPEAN POLITICS |
|  | WOMEN & POLITICS |
