# Supplementary material for: A State of the Art on Emotions in the Context of Public Policymaking
Source: publisher site journal article supplement (doi:10.1515/spp-2025-0021), 2025-06-01
Supplement: Supplementary file 2 [file j_spp-2025-0021_suppl_002.xlsx]

## Sheet: Tabelle1
Publication Type	Author Full Names	Article Title	Publication Year	Source Title	Author Keywords	Abstract	Content	Method						Codes - CONTENT					Codes - METHOD
J	Jenke, Libby	Affective Polarization and Misinformation Belief	2024	POLITICAL BEHAVIOR	Affective polarization; Misinformation; Political behavior	While affective polarization has been shown to have serious social consequences, there is little evidence regarding its effects on political attitudes and behavior such as policy preferences, voting, or political information accrual. This paper provides evidence that affective polarization impacts misinformation belief, arguing that citizens with higher levels of affective polarization are more l…	APOL	SUR						APOL = affective polarisation					CON =Conceptual Paper
J	Diermeier, Daniel; Li, Christopher	Dynamics of Polarization: Affective Partisanship and Policy Divergence	2023	BRITISH JOURNAL OF POLITICAL SCIENCE	affective polarization; policy extremism; behavioral voting	We explore the dynamics of affective partisanship and policy divergence in a behavioral voting model. Voters are adaptive and influenced by partisan affect, while political parties are rational and office motivated. We show that the affective partisanship of the electorate and the divergence of party platforms can be mutually reinforcing, thus providing an explanation for the observed co-movement…	VOT	CON		Systematic review literature				ATT = (political) attitudes					DISC = Discourse Analysis
J	Huddy, Leonie; Yair, Omer	Reducing Affective Polarization: Warm Group Relations or Policy Compromise?	2021	POLITICAL PSYCHOLOGY	affective polarization; partisanship; experiment; leader relations; issue compromise	Hostility between rival political partisans, referred to as affective polarization, has increased in the United States over the last several decades generating considerable interest in its reduction. The current study examines two distinct sets of factors that potentially reduce affective polarization, drawn respectively from a group-based and a policy-based model of its origins. Specifically, we…	APOL	EXP		Narrative review (added literature)				BEHAV = behaviour					EXP = Experiment
J	Druckman, James N.; Klar, Samara; Krupnikov, Yanna; Levendusky, Matthew; Ryan, John Barry	(Mis)estimating Affective Polarization	2022	JOURNAL OF POLITICS	affective polarization; partisanship; citizenship; survey experiment; measurement	Affective polarization-the tendency of ordinary partisans to dislike and distrust those from the other party-is a defining feature of contemporary American politics. High levels of out-party animus stem, in part, from misperceptions of the other party's voters. Specifically, individuals misestimate the ideological extremity and political engagement of typical out-partisans. When partisans are ask…	APOL	SUR						x = N/A					INT = Interview
J	Wilinska, Monika; Bulow, Pia H.	Emotion ability-practices of affective citizenship in the work rehabilitation process	2020	CRITICAL POLICY STUDIES	Emotions; institutional talk; work rehabilitation; affective citizenship	This article introduces the concept of emotion ability to illuminate the process whereby institutional meetings become an arena for testing, evoking, and regulating emotions that are deemed necessary to meet institutional goals. It focuses on the relationships and practices that are collaboratively constructed by welfare workers and clients when they interact within the context of institutional m…	x	INT						Z = Other (residual catgeory)					META = Meta-Analysis (e.g., literature review)
J	Goel, Natasha; Merkley, Eric	The Nature of Online Talk: Incivility of Opposing Views and Affective Polarization	2024	POLITICAL BEHAVIOR	Affective polarization; Polarization; Civility; Social media; Political communication; Public opinion	Affective polarization is on the rise. Increasing polarization is often attributed to the nature of political discussion on social media platforms, but little is known about the affective consequences of the incivility of online discussion. This study adopts a trust game to consider whether people punish the incivility of both out-partisans and co-partisans and whether there are gender-related di…	APOL	SUR						PPR = policy preference/support					x = Other (as a residual category)
J	Balcells, Laia; Daniels, Lesley-ann; Kuo, Alexander	Territorial disputes and affective polarization	2024	EUROPEAN JOURNAL OF POLITICAL RESEARCH	polarization; territorial disputes; secessionism; nationalism; social identity	Can territorial disputes within countries be a basis for affective polarization? If so, how does it vary across territories? A burgeoning literature on affective polarization has largely focused on partisan divisions; we argue that contentious political issues such as those relating to territorial integrity can also be a basis for such affective polarization, where citizens feel concord with thos…	APOL	SUR						PCOMM = pol communication, framing					QCA = Qualitative Text Analysis
J	Erisen, Cengiz; Lodge, Milton; Taber, Charles S.	Affective Contagion in Effortful Political Thinking	2014	POLITICAL PSYCHOLOGY	mediation; political thinking; motivated reasoning; affect priming	We offer a theory of motivated political reasoning based on the claim that the feelings aroused in the initial stages of processing sociopolitical information inevitably color all phases of the evaluation process. When a citizen is called on to express a judgment, the considerations that enter into conscious rumination will be biased by the valence of initial affect. This article reports the resu…	BEHAV	EXP						THE = theoretical paper					QTA = Quantitative Text Analysis
J	Lucas, Jack; Sheffer, Lior	What explains elite affective polarization? Evidence from Canadian politicians	2024	POLITICAL PSYCHOLOGY		Concerns about affective polarization are on the rise globally, and it has been associated with negative outcomes such as diminished trust in government and discrimination against out-partisans. While elected politicians are typically thought to be a major source of mass-level affective polarization, and despite the policy and representation consequences of heightened partisan hostility in legisl…	APOL	SUR						VOT = voting behaviour & electoral support					SUR = Survey
J	Rogowski, Jon C.; Sutherland, Joseph L.	How Ideology Fuels Affective Polarization	2016	POLITICAL BEHAVIOR	Polarization; Ideology; Electoral competition; Affect	Scholars have reached mixed conclusions about the implications of increased political polarization for citizen decision-making. In this paper, we argue that citizens respond to ideological divergence with heightened affective polarization. Using a survey experiment conducted with a nationally representative sample of U.S. citizens, we find that increased ideological differences between political …	APOL	SUR
J	Dias, Nicholas; Lelkes, Yphtach	The Nature of Affective Polarization: Disentangling Policy Disagreement from Partisan Identity	2022	AMERICAN JOURNAL OF POLITICAL SCIENCE		Democrats and Republicans clearly dislike one another. Yet, scholars debate whether policy disagreement or partisan identity, per se, drives interparty animus. Past studies suggest the relationship between partisanship and interpersonal affect is spurious, driven by inferred policy preferences. We argue, instead, that policy preferences signal partisan identity when the parties' stances on an iss…	BEHAV; APOL	SUR; EXP
J	Johnston, Christopher D.	Authoritarianism, Affective Polarization, and Economic Ideology	2018	POLITICAL PSYCHOLOGY	authoritarianism; ideology; polarization; partisanship; economic policy; personality; cognitive ability	I consider two theories of affective polarization between Democrats and Republicans in the United States: (1) ideological divergence on size-of-government issues (Webster & Abramowitz, ) and (2) authoritarianism-based partisan sorting (Hetherington & Weiler, ). I argue that these alternatives cannot be easily disentangled, because politically engaged citizens seek out and assimilate information a…	APOL	SUR; EXP
J	Kingzette, Jon; Druckman, James N.; Klar, Samara; Krupnikov, Yanna; Levendusky, Matthew; Ryan, John Barry	HOW AFFECTIVE POLARIZATION UNDERMINES SUPPORT FOR DEMOCRATIC NORMS	2021	PUBLIC OPINION QUARTERLY		Does affective polarization-the tendency to view opposing partisans negatively and co-partisans positively-undermine support for democratic norms? We argue that it does, through two mechanisms First, in an age of elite polarization, norms have been politicized. This leads affectively polarized partisans to oppose particular constitutional protections when their party is in power but support them …	APOL	SUR
J	Robison, Joshua; Moskowitz, Rachel L.	The Group Basis of Partisan Affective Polarization	2019	JOURNAL OF POLITICS	partisan polarization; social groups; affect; panel analyses	What explains rising partisan animosity in the United States? We argue that mass partisans' feelings toward the social group coalitions of the parties are an important cause of rising affective polarization. We first leverage evidence from the American National Election Study (ANES) Time Series to show that partisans' feelings toward the social groups linked to their in-party (out-party) have gro…	APOL	SUR
J	Nguyen, Christoph G.; Mayer, Sabrina J.; Veit, Susanne	The impact of emotions on polarization. Anger polarizes attitudes towards vaccine mandates and increases affective polarization	2022	RESEARCH & POLITICS	COVID-19; emotions; vaccination; Germany; polarization	When does anger lead to greater polarization? As societal polarization and political polarization increase so does academic interest in its antecedents. One important cause of polarization appears to be anger. However, existing research linking anger and political polarization has focused primarily on the context of partisanship and did not distinguish between different types of anger nor differe…	APOL	SUR
J	Gidron, Noam; Adams, James; Horne, Will	Who Dislikes Whom? Affective Polarization between Pairs of Parties in Western Democracies	2023	BRITISH JOURNAL OF POLITICAL SCIENCE	polarization; ideology; coalitions; electoral institutions; radical right	While dislike of opposing parties, that is, affective polarization, is a defining feature of contemporary politics, research on this topic largely centers on the United States. We introduce an approach that analyzes affective polarization between pairs of parties, bridging the US two-party system and multiparty systems in other democracies. Analyzing survey data from twenty Western democracies si…	APOL	SUR
J	Hall, Todd H.; Ross, Andrew A. G.	Rethinking Affective Experience and Popular Emotion: World War I and the Construction of Group Emotion in International Relations	2019	POLITICAL PSYCHOLOGY	group emotion; identity; international relations; legitimacy; popular emotion; populism; affect; World War I	Research in International Relations (IR) frequently confronts claims about the emotions shared by members of a group. While much attention has been devoted to the potential for affective and emotional experience beyond the individual level, IR scholars have said less about the politics of invoking popular emotion. This article addresses that gap. Specifically, we argue that between individual-and…	Z	CON
J	Druckman, James N.; Levendusky, Matthew S.	WHAT DO WE MEASURE WHEN WE MEASURE AFFECTIVE POLARIZATION?	2019	PUBLIC OPINION QUARTERLY		Affective polarization-the tendency of Democrats and Republicans to dislike and distrust one another-has become an important phenomenon in American politics. Yet, despite scholarly attention to this topic, two measurement lacunae remain. First, how do the different measures of this concept relate to one another-are they interchangeable? Second, these items all ask respondents about the parties. W…	APOL	SUR
J	Tervasmaeki, Tuomas	Anticipatory policy rhetoric: exploring ideological fantasies of Finnish higher education	2024	CRITICAL POLICY STUDIES	Anticipatory governance; poststructuralist discourse theory; critical fantasy studies; Finnish higher education; policy analysis; affective rhetoric	This research explores how anticipatory policymaking played out in Finnish higher education reform. The study applies a discourse theoretic framework to explore how policy narrative might prove attractive to subjects by mobilizing ideas, norms, and fantasies through affective identification. Fantasies frame and stabilize our sense-making practices, thereby providing affective belonging and (ir)ra…	PCOMM	DISC
J	Luttig, Matthew D.	The Prejudiced Personality and the Origins of Partisan Strength, Affective Polarization, and Partisan Sorting	2018	POLITICAL PSYCHOLOGY	polarization; partisanship; personality	Over the last few decades, the American public has become more strongly partisan, affectively polarized, and sorted (i.e., aligned their partisanship with their policy preferences). This article presents a theory of partisanship in contemporary American politics as rooted in the prejudiced personality: need for closure. Based on uncertainty-identity theory and the theory of groups as epistemic pr…	APOL	SUR
J	Penz, Otto; Sauer, Birgit	Neoliberal technologies of social protection: affects and policy implementation	2020	CRITICAL POLICY STUDIES	Karl Polanyi; Michel Foucault; affective governmentality; neoliberalism; employment agents	In the context of Polanyi's 'double movement' of market forces and social protection this article explores the work of state agents and processes of subjectivation at the workplace according to the contemporary social policy paradigm of activation. We exemplify the transformation of welfare institutions and policies in the neoliberal period through one of the major 'disruptive strains' of self-re…	x	x
J	Klar, Samara; Krupnikov, Yanna; Ryan, John Barry	AFFECTIVE POLARIZATION OR PARTISAN DISDAIN? UNTANGLING A DISLIKE FOR THE OPPOSING PARTY FROM A DISLIKE OF PARTISANSHIP	2018	PUBLIC OPINION QUARTERLY		Recent scholarship suggests that American partisans dislike other party members so much that partisanship has become the main social divide in modern politics. We argue that at least one measure of this affective polarization conflates a dislike for members of the other party with a dislike for partisanship in general. The measure asks people how they feel about their child marrying someone from …	APOL	EXP
J	Orr, Lilla V. V.; Fowler, Anthony; Huber, Gregory A. A.		2023	AMERICAN JOURNAL OF POLITICAL SCIENCE		Partisan Americans like members of their own party more than members of the opposing party. Scholars often interpret this as evidence that party identity or loyalty influence interpersonal affect. First, we reassess previous studies and demonstrate that prior results are also consistent with what we would predict if people cared only about policy agreement. Next, we demonstrate the difficulty of …	APOL	EXP
J	Mason, Lilliana	A CROSS-CUTTING CALM HOW SOCIAL SORTING DRIVES AFFECTIVE POLARIZATION	2016	PUBLIC OPINION QUARTERLY		Although anecdotal stories of political anger and enthusiasm appear to be provoked largely by issues such as gay marriage or healthcare reform, social sorting is capable of playing a powerful role in driving anger and enthusiasm, undercutting the perception that only practical disagreements are driving higher levels of political rancor. Because a highly aligned set of social identities increases …	PCOMM	SUR
J	Amsalem, Eran; Merkley, Eric; Loewen, Peter John	Does Talking to the Other Side Reduce Inter-party Hostility? Evidence from Three Studies	2022	POLITICAL COMMUNICATION	Affective polarization; interpersonal communication; political discussion; peer networks; intergroup contact	According to recent scholarship, citizens in various Western democracies show a growing sense of dislike and distrust toward members of opposing political parties. While political communication processes have been shown to influence inter-party hostility, the literature has so far focused mainly on mass-mediated communication. We argue here that affective polarization might also be determined by …	PCOMM; APOL	SUR
J	Dinas, Elias; Hartman, Erin; van Spanje, Joost	Dead Man Walking: The Affective Roots of Issue Proximity Between Voters and Parties	2016	POLITICAL BEHAVIOR	Projection; Persuasion; Issue proximity; Perception bias; Party placement; Pim fortuyn; Netherlands	Do voters like the party they already agree with or do they agree with the party they already like? Previous studies have suggested a link from preferences to perceptions. However, such a causal link has not been convincingly demonstrated. Most issue voting studies have adopted the basic premise of spatial models of voting-that voters compare parties' positions with their own ideal points and app…	VOT	EXP
J	Jupp, Eleanor	Emotions, affect and social policy: austerity and Children's Centers in the UK	2022	CRITICAL POLICY STUDIES	Affect; austerity; emotions; children's services; activism	This paper considers the 'affective turn' within social sciences, alongside the shift to a more emotional public and political sphere, and the implications of these shifts for the study of social policy. A context of austerity cuts and reforms to welfare services contributes to heightened and unstable emotions surrounding services. A case study of Sure Start Children's Centers in the UK is presen…	Z	INT
J	Horne, Will; Adams, James; Gidron, Noam	The Way we Were: How Histories of Co-Governance Alleviate Partisan Hostility	2023	COMPARATIVE POLITICAL STUDIES	elections; public opinion; voting behavior; political parties; representation; electoral systems	Comparative politics scholars argue that consensual democratic institutions encourage power-sharing that promotes kinder, gentler politics. We uncover one reason why this is the case: elite inter-party cooperation in consensual systems is associated with reduced inter-party hostility in the mass public. This is because governing parties' supporters feel much more warmly toward their coalition par…	BEHAV	SUR
J	Nelson, TE	Group affect and attribution in social policy opinion	1999	JOURNAL OF POLITICS		Outgroup attitudes have important effects on policy opinions, but there are conflicting ideas on how to conceptualize and measure affective and cognitive responses to outgroups, and how these different dimensions of evaluation contribute to opinion. The present study analyzes the internal structure of nonpoor whites' emotional responses toward blacks and the poor and their attributions for these …	PPR	SUR
J	Hahm, Hyeonho; Hilpert, David; Koenig, Thomas	Divided We Unite: The Nature of Partyism and the Role of Coalition Partnership in Europe	2024	AMERICAN POLITICAL SCIENCE REVIEW		Highlighting the strength of partyism in many democracies, recent scholarship pays keen attention to increasing hostility and distrust among citizens across party lines, known as affective polarization. By combining a conjoint analysis with decision-making games such as dictator and trust games, we design a novel survey experiment to systematically estimate and compare the strength of the partisa…	APOL	SUR
J	Durnova, Anna	Psychosocial well-being, policies, and the emotional boundaries of home	2024	CRITICAL POLICY STUDIES	COVID-19; home; emotions; sociology of emotions; feminism; psychosocial well-being; public policy	The COVID-19 pandemic has significantly influenced public interventions concerning citizens' emotions. This paper delves into the associated policy discourse by examining the link between individual accounts of psychosocial well-being and their portrayal in public through policies and regulatory actions. The concept of emotional boundaries of home, elucidated through an analysis of citizen experi…	PCOMM	DISC
J	Costa, Mia	Ideology, Not Affect: What Americans Want from Political Representation	2021	AMERICAN JOURNAL OF POLITICAL SCIENCE		How do citizens want to be represented by elected officials in an era of affective polarization? Contemporary narratives about American politics argue that people embrace elite expressions of negative partisanship, above and beyond representation on policy. Using three conjoint experiments, I examine how individuals weigh the relative value of substantive representation on issues, constituency se…	APOL	EXP
J	Edinger, Harald	Hooked on a Feeling: Russia's Annexation of Crimea Through the Lens of Emotion	2023	POLITICAL PSYCHOLOGY	affect and emotion; foreign policy analysis; international relations theory; rationality; Russia; status	This article tests the plausibility of an affect-centered framework for foreign policy analysis, using the 2014 annexation of Crimea as an illustrative case. It identifies questions left open by prevailing accounts based on international relations theory and shows how a supplementary conceptual lens can improve existing explanations. The affective perspective suggests that the Russian president d…	Z	DISC
J	Hobolt, Sara B.; Lawall, Katharina; Tilley, James	The Polarizing Effect of Partisan Echo Chambers	2024	AMERICAN POLITICAL SCIENCE REVIEW		We are witnessing increasing partisan polarization across the world. It is often argued that partisan echo chambers are one of the drivers of both policy and affective polarization. In this article, we develop and test the argument that the political homogeneity of people's social environment shapes polarization. Using an innovative, large-scale pre-registered lab-in-the-field experiment in the U…	APOL	EXP
J	Oxley, Douglas R.; Vedlitz, Arnold; Wood, B. Dan	The Effect of Persuasive Messages on Policy Problem Recognition	2014	POLICY STUDIES JOURNAL	policy problem recognition; persuasive messages; attitudinal response; global warming	Prior theories of individual behavior in recognizing public problems have centered on the role of policy entrepreneurs; institutional effects; information; and cultural, political, and social pressures. Our extension of these theories suggests that policy problem recognition is an attitudinal evaluation process. If the information is considered valid and the new attitude is negative in valence, t…	PPR	SUR
J	Thompson, S; Hoggett, P	The emotional dynamics of deliberative democracy	2001	POLICY AND POLITICS	group; emotion; deliberation; jury	Proponents of deliberative democracy claim that it can provide a fair, efficient and creative method of collective decision making. In practice, however, all groups, including those consulted within public spaces for deliberation such as consultative forums, are, in part, characterised by emotional dynamics that threaten to undermine such deliberation. These dynamics can distort the process of de…	BEHAV	CON
J	Newman, Janet	Performing new worlds? Policy, politics and creative labour in hard times	2013	POLICY AND POLITICS	austerity; performance; border work; neoliberalism	This paper addresses the problem of how to engage with the politics of public policy in the current period of cuts, austerity and retrenchment. It explores current strategies of divestment, design and decentralisation, assessing the scope within each for creative enactments and alternative pathways. It then explores 'public-making' as a means of countering the affective consequences of austerity,…	x	CON
J	Hare, Christopher; Highton, Ben; Jones, Bradford	Assessing the Structure of Policy Preferences: A Hard Test of the Low-Dimensionality Hypothesis	2024	JOURNAL OF POLITICS	low-dimensionality hypothesis; policy preferences	This article analyzes belief systems in a novel way, modeling relational patterns of policy disagreements using nonmetric multidimensional scaling. Because of its flexible assumptions, the approach enables us to conduct a notably harder test of the low-dimensionality hypothesis than is found in previous work. The results support the proposition that a basic space (consisting of a small number of …	PPR	SUR
J	Druckman, James N.; Gubitz, S. R.; Lloyd, Ashley M.; Levendusky, Matthew S.	How Incivility on Partisan Media (De)Polarizes the Electorate	2019	JOURNAL OF POLITICS	partisan media; civility; affective polarization; conflict orientation	Partisan media-typically characterized by incivility-has become a defining element of the American political communication environment. While scholars have explored the consequences of partisan media for political attitudes and behaviors, little work has looked at how variations in incivility moderate partisan media's effects. Using a population-based survey experiment, we show that incivility af…	BEHAV	EXP
J	Hawkins, Benjamin; van Schalkwyk, May C., I	Politics and fantasy in UK alcohol policy: a critical logics approach	2024	CRITICAL POLICY STUDIES	Critical logics; alcohol policy; alcohol industry; fantasy; UK	The Scottish Government's policy of minimum unit price (MUP) for alcohol has received significant scholarly attention. Much of the focus of this literature has been on the efforts by sections of the alcohol industry to oppose the policy, including attempts to 'frame' key terms of the debate and an understanding of its legitimacy and effects within the wider field of interpretative policy analysis…	PCOMM	DISC
J	Tilley, James; Hobolt, Sara B.	Brexit as an Identity: Political Identities and Policy Norms	2023	PS-POLITICAL SCIENCE & POLITICS		The decision by a narrow majority of British voters to leave the European Union (EU) in 2016 was a political earthquake that few had seen coming. It produced new political divisions, not only between the United Kingdom and the rest of Europe but also within the United Kingdom. In particular, the referendum campaign and the outcome generated two new political identities: Leavers and Remainers. The…	x	SUR
J	Mason, Lilliana	IDEOLOGUES WITHOUT ISSUES THE POLARIZING CONSEQUENCES OF IDEOLOGICAL IDENTITIES	2018	PUBLIC OPINION QUARTERLY		The distinction between a person's ideological identity and their issue positions has come more clearly into focus in recent research. Scholars have pointed out a significant difference between identity-based and issue-based ideology in the American electorate. However, the affective and social effects of these separate elements of ideology have not been sufficiently explored. Drawing on a nation…	APOL	SUR
J	Whiteley, Paul; Clarke, Harold D.; Sanders, David; Stewart, Marianne C.	Government Performance and Life Satisfaction in Contemporary Britain	2010	JOURNAL OF POLITICS		This paper investigates relationships between public policy outcomes and life satisfaction in contemporary Britain. Monthly national surveys gathered between April 2004 and December 2008 are used to analyze the impact of policy delivery both at the micro and macro levels, the former relating to citizens' personal experiences, and the latter to cognitive evaluations of and affective reactions to t…	Z	SUR
J	Suthammanont, Christina; Peterson, David A. M.; Owens, Chris T.; Leighley, Jan E.	Taking Threat Seriously: Prejudice, Principle, and Attitudes Toward Racial Policies	2010	POLITICAL BEHAVIOR	Racial attitudes; Anxiety; Threat; Prejudice; Emotion; Affirmative action	Drawing from group theories of race-related attitudes and electoral politics, we develop and test how anxiety influences the relative weight of prejudice as a determinant of individuals' support for racial policies. We hypothesize that prejudice will more strongly influence the racial policy preferences of people who are feeling anxious than it will for people who are not. Using an experimental d…	PPR	EXP
J	Diermeier, Daniel; Li, Christopher	Partisan Affect and Elite Polarization	2019	AMERICAN POLITICAL SCIENCE REVIEW		We examine the interaction between partisan affect and elite polarization in a behavioral voting model. Voting is determined by affect rather than rational choice. Parties are office-motivated; they choose policies to win elections. We show that parties bias their policies toward their partisans if voters exhibit ingroup responsiveness, i.e., they respond more strongly to their own party's policy…	VOT	CON
J	Fishkin, James; Siu, Alice; Diamond, Larry; Bradburn, Norman	Is Deliberation an Antidote to Extreme Partisan Polarization? Reflections on America in One Room	2021	AMERICAN POLITICAL SCIENCE REVIEW		This paper is positioned at the intersection of two literatures: partisan polarization and deliberative democracy. It analyzes results from a national field experiment in which more than 500 registered voters were brought together from around the country to deliberate in depth over a long weekend on five major issues facing the country. A pre-post control group was also asked the same questions. …	APOL	EXP
J	Marsh, Wayde Z. C.	The Devil No More? Decreasing Negative Outparty Affect through Asymmetric Partisan Thinking	2023	PUBLIC OPINION QUARTERLY		Political scientists, party elites, and journalists agree that affective polarization and negative partisanship are serious problems in American politics, but is it possible to reverse this trend and decrease negative outparty affect? Using two original survey experiments that manipulate partisans to think of the Republican and Democratic parties in either expressive or instrumental terms, I find…	APOL	SUR
J	Hornung, Johanna; Bandelow, Nils C.	Social identities, emotions and policy preferences	2025	POLICY AND POLITICS	social identities in the policy process (SIPP); social identity theory (SIT); food policy; transport policy; emotions in public policy; vegetarian identity; car identity; policy research	Emotions are gaining increasing attention in public policy. Policy process research so far has focused on the effects of emotions rather than their roots. In social psychology, emotions are a central part of social identity theory (SIT), and the relevance of social identities in the policy process (SIPP) has recently been acknowledged. This raises the question of how the identification with socia…	PPR	SUR
J	Durnova, Anna	Making interpretive policy analysis critical and societally relevant: emotions, ethnography and language	2022	POLICY AND POLITICS	words birth; critical policy; Czech Republic; discourse; emotions; fatherhood; interpretive policy analysis; policy debate	This article summarises the main achievements of interpretive approaches to policy analysis and signposts ways to develop them to strengthen inclusivity and diversity. By visualising tangible strategies used in the approach, it demonstrates how we can better understand how policies are made and understood. At the same time, the article places a strong focus on emotions and ethnography as a way to…	THE	CON
J	Paterson, Stephanie; Larios, Lindsay	Emotional problems: policymaking and empathy through the lens of transnational motherhood	2021	CRITICAL POLICY STUDIES	Emotional discourse analysis; social empathy; feminist and critical policy analysis; caregiver program; Canada	In this paper, we explore the role of social empathy in policymaking. Social empathy extends empathy from an interpersonal disposition to the social and political structures that inform policy processes and outcomes. Empathy requires an emotional understanding of phenomena, which we suggest can be cultivated through an emotional analysis of policy, and can result in more socially just outcomes. B…	THE	CON; DISC
J	Rudolph, TJ	Group attachment and the reduction of value-driven ambivalence	2005	POLITICAL PSYCHOLOGY	ambivalence; value conflict; response variability; survey response; campaign finance reform	This article analyzes the effects of value-driven ambivalence and group attachment on response variability in public attitudes toward campaign finance reform. The analysis demonstrates that group attachment, when activated by affective cues, moderates the effects of ambivalence on response variability. By tipping the balance of considerations in one direction or the other, group attachments make …	PPR	SUR
J	Pace, Michelle; Bilgic, Ali	Trauma, Emotions, and Memory in World Politics: The Case of the European Union's Foreign Policy in the Middle East Conflict	2018	POLITICAL PSYCHOLOGY	emotions; trauma; memory; world politics; European Union; Middle East conflict; EU foreign policy	This article focuses on the impact of emotions on the European Union (EU)'s international identity and agency in the context of the memory of trauma. Emotions are understood as performances through which an actor expresses itself to others while constructing its identity, creating its agency, and potentially affecting the social order. It is argued that the memory of trauma is translated into EU …	Z	DISC
J	Durnova, Anna	Understanding Emotions in Policy Studies through Foucault and Deleuze	2018	POLITICS AND GOVERNANCE	Deleuze; emotion; Foucault; interpretation; interpretive analysis; knowledge; meaning; policy studies	Discussing Foucault's and Deleuze's work on meaning-making, the article argues that we might make better use of the intersubjectivity of a meaning when interpreting emotions. Interpreting emotions in texts remains complicated because discussion on the ontological character of emotions sustains an opposition of emotion to meaning structures. Both Foucault and Deleuze conceive meaning-making throug…	THE	CON
J	Price, Vincent; David, Clarissa; Goldthorpe, Brian; Roth, Marci McCoy; Cappella, Joseph N.	Locating the issue public: The multi-dimensional nature of engagement with health care reform	2006	POLITICAL BEHAVIOR	issue publics; public opinion; political information; political participation; health care reform	This research examines in detail the structure of the issue public for health care reform, drawing from extensive, nationally representative survey data tapping general attentiveness to news and public affairs, specific interests in health care issues, and motivations (e.g., personal health and financial conditions) to follow health care reform issues. We furthermore adopt a multi-dimensional app…	x	SUR
J	Rasmussen, Anne; Reher, Stefanie	Public opinion towards interest groups: The differential impact of ties to cause and business groups	2024	EUROPEAN JOURNAL OF POLITICAL RESEARCH	interest groups; public opinion; legitimacy; survey experiment	Interest groups are often included as key actors in consultation processes, with the aim of making policy more effective, fair and representative. At the same time, their influence is frequently viewed with suspicion. This research note uses survey experiments in Germany, the United Kingdom and the United States (N = 9,357) to explore how the ties citizens hold to different types of interest grou…	ATT	SUR
J	Lee, Hyelim; Snow, Nancy	Gendered experience in student mobility programs-Global Korea Scholarship recipients' evaluation of Korea's country image	2021	POLITICS & POLICY	adjustment; Asia; country image; discrimination; gender and education; gender diplomacy; Global Korea Scholarship; higher education; P&P Special Issue; public diplomacy; South Korea	According to 2012 Organisation for Economic Co-operation and Development (OECD) statistics, 11 of 19 OECD countries have a higher female international student participation ratio in student mobility. South Korea has a higher ratio of female international students in general and a higher ratio of female Global Korea Scholarship (GKS) recipients. In 2018 and 2019, we surveyed GKS students about the…	x	SUR
J	MOSKOWITZ, D; STROH, P	PSYCHOLOGICAL SOURCES OF ELECTORAL RACISM	1994	POLITICAL PSYCHOLOGY	ELECTIONS; VOTING BEHAVIOR; CANDIDATE PERCEPTION; SYMBOLIC RACISM	This paper examines the effect of racial cues on candidate perception and evaluation. In an experimental setting, we manipulated the race of a hypothetical candidate. Our causal model then examines how the candidate's race influences voters through stereotyping biases as well as the more ''affect-laden'' impact of racial prejudice. The experimental design affords many advantages over traditional …	ATT	SUR
J	Jon, Jae-Eun; Ayhan, Kadir Jun	Satisfied or dissatisfied: The determinants of Global Korea Scholarship recipients' satisfaction with life in Korea	2021	POLITICS & POLICY	Asia; Global Korea Scholarship; international student mobility; P&P Special Issue; public diplomacy; satisfaction; South Korea	Sponsored international student mobility programs are important public diplomacy tools for governments. These programs' positive outcomes are usually taken for granted and are rarely assessed. International students' satisfaction with life in the host country is an important variable for their behavioral outcomes related to the host country. This study used data from two surveys of Global Korea S…	x	SUR
J	Baekgaard, Martin; Christensen, Julian; Dahlmann, Casper Mondrup; Mathiasen, Asbjorn; Petersen, Niels Bjorn Grund	The Role of Evidence in Politics: Motivated Reasoning and Persuasion among Politicians	2019	BRITISH JOURNAL OF POLITICAL SCIENCE	motivated reasoning; information; persuasion; evidence; political decision making; elite decision making; evidence-based policy making	Does evidence help politicians make informed decisions even if it is at odds with their prior beliefs? And does providing more evidence increase the likelihood that politicians will be enlightened by the information? Based on the literature on motivated political reasoning and the theory about affective tipping points, this article hypothesizes that politicians tend to reject evidence that contra…	BEHAV	EXP
J	Hjermitslev, Ida B. B.	Punishing the pseudo-opposition: Accountability under a minority government	2024	EUROPEAN JOURNAL OF POLITICAL RESEARCH	accountability; minority government; party sympathy; retrospective voting	Minority governments often rely on the legislative support of parties, which play an ambiguous role in politics: while they are formally part of the opposition, they are simultaneously committed to keeping the government in office and passing its bills. Are these support parties protected from the electoral cost of governing or do voters recognize their responsibility for policy outcomes and hold…	x	SUR
J	Bram, Curtis	The Most Important Election of Our Lifetime: Focalism and Political Participation	2023	POLITICAL PSYCHOLOGY	participation; polarization; focalism; cognitive bias	This article argues that a psychological bias called focalism contributes to an overestimation of the differences between political candidates, which in turn increases participation and polarization. Focalism causes people to confuse the allocation of attention to things with the importance of those things. Because attention to politics typically centers on conflict, the result is an exaggeration…	APOL	EXP
J	Zinni, FP; Rhodebeck, LA; Mattei, F	The structure and dynamics of group politics: 1964-1992	1997	POLITICAL BEHAVIOR		In the realm of politics the relevance of groups derives from their centrality to government institutions, the policy process, and election campaigns. In addition, individuals have a predisposition to rely on cues and shortcuts when making choices and forming preferences; groups are ideal for this purpose. Groups help orient individuals to their social world by providing standards, supplying info…	x	SUR
J	Young, Alasdair R.	The value of pointillism? Integrating trade and development and the European Union as a global actor	2014	CONTEMPORARY POLITICS	trade; development; effectiveness; normative power Europe	As the contributions to this volume make clear, the intersection between the European Union's (EU) trade and development policies is populated by a diverse array of policies. The EU's selection of policies reflects, in part, the level of development of the developing country and competing understandings of how to best foster development. The contributions also hint at significant contributions to…	x	x
J	Connors, Elizabeth C.	Party Foul: The Effectiveness of Political Value Rhetoric is Constrained by Party Ownership	2024	POLITICAL BEHAVIOR	political values; party ownership; political parties; political rhetoric; polarization	Politicians use political value rhetoric to win elections or persuade constituents towards policy positions, but the effectiveness of this rhetoric is unclear. I argue that partisan forces constrain the effectiveness of this rhetoric and that this constraint is conditional based on the value evoked and the match between the politician's and message recipient's partisanship. To examine this, I con…	PCOMM; APOL	SUR
J	Hamlett, Patrick W.; Cobb, Michael D.	Potential solutions to public deliberation problems: Structured deliberations and polarization cascades	2006	POLICY STUDIES JOURNAL		Some deliberative theorists advocate for increased public participation to improve the health and vitality of democracy, but skeptics warn that public deliberation may fall prey to multiple decision-making pathologies. We describe a research program based on structured public deliberations about science and technology policies that was designed to explore the validity of critics' worst fears. In …	APOL	EXP
J	Majumdar, Rajeshwari	Partisan Identity, Counter-Attitudinal Information, and Selective Criticism in India	2024	POLITICAL BEHAVIOR	Public opinion; Motivated reasoning; Backlash; Political information; India	How do people react to information that challenges their party's policies? While most of the existing literature focuses on possible changes in issue opinions, we know less about other implicit and explicit ways people may contend with counter-attitudinal information. In an online experiment in India, I present participants with potentially incongruent information about a controversial economic p…	x	SUR
J	Coole, D	Agency, truth and meaning: Judging the Hutton Report	2005	BRITISH JOURNAL OF POLITICAL SCIENCE		The Hutton Report is now established as an important element of Britain's involvement in the Iraq War. In this article the ideas that underpin it are analysed. In particular, the focus is on Hutton's presuppositions concerning the nature of truth, agency, subjectivity, meaning and language. It is shown how unquestioned assumptions structured his method and shaped his conclusions. Although such pr…	x	META
J	ZUCKERT, CH	ON THE RATIONALITY OF RATIONAL CHOICE	1995	POLITICAL PSYCHOLOGY	POSTMODERN; THUMOS, OR SPIRITEDNESS; DELIBERATION OR DELIBERATIVE REASON; CALCULATION	Proponents argue that rational choice theory is a form of positive science, one whose simplified model of the human psyche generates useful predictions of human behavior, But their assumptions are contrary to fact. Their analyses of public policy decisions are cast in terms of the sharp and now largely discredited distinction logical positivists drew between ''facts'' and ''values'' or efficient …	BEHAV	CON
J	Vasilopoulou, Sofia; Talving, Liisa	Opportunity or threat? Public attitudes towards EU freedom of movement	2019	JOURNAL OF EUROPEAN PUBLIC POLICY	Attitudes; EU freedom of movement; identity; macro-economic conditions; utility	This article examines the effect of individual and contextual variables on preference formation towards European Union (EU) freedom of movement. Our multilevel analyses of Eurobarometer data show that citizens with low levels of human capital and strong feelings of national identity are more likely to oppose intra-EU migration. However, we argue that in order to fully grasp variation in public pr…	ATT	SUR
J	Maor, Moshe	An emotional perspective on the Multiple Streams Framework	2024	POLICY STUDIES JOURNAL	emotional agenda window; emotional decision window; emotional policy entrepreneurs; emotions; multiple stream framework; emotional agenda window; emotional decision window; emotional policy entrepreneurs; emotions; multiple stream framework	Emotions are central to human behavior and, consequently, play a significant role in policymaking. While the Multiple Streams Framework (MSF) incorporates the notion of public mood into the political stream, this concept primarily focuses on a fleeting, less intense, and diffuse emotional state that is not necessarily linked to a specific triggering event or policy-related object. To address this…	BEHAV	CON
J	Boossabong, Piyapong; Chamchong, Pobsook	Hope, fear and public policy: towards empathetic policy process	2024	CRITICAL POLICY STUDIES	Emotion; empathy; hope; fear; interpretive policy inquiry; critical policy studies	With current global issues that destroy people's hope and create fear, public policy should become more emotionally sensitive. We argue that, under the umbrella of critical policy studies, incorporating interpretive policy inquiry into the policy process helps promote emotionally sensitive public policy that can increase hope to cope with fear. Accordingly, we propose a framework for fostering an…	THE	CON
J	TEDIN, KL	SELF-INTEREST, SYMBOLIC VALUES, AND THE FINANCIAL EQUALIZATION OF THE PUBLIC-SCHOOLS	1994	JOURNAL OF POLITICS		Using a natural experiment in which some school districts stood to lose dollars due to court-ordered financial equalization and others stood to gain dollars, I test theories of self-interest and symbolic politics as predictors of dependent variables with racial overtones. The data show a substantial self-interest effect. However, even with the presence of a self-interest effect, symbolic values a…	PPR	EXP
J	Huddy, Leonie; Bankert, Alexa; Davies, Caitlin	Expressive Versus Instrumental Partisanship in Multiparty European Systems	2018	POLITICAL PSYCHOLOGY	partisanship; identity strength; multiparty; political behavior	Partisanship has a powerful influence on political behavior in the United States, but its influence is less certain in European democracies. Part of the debate concerning the influence of partisanship in Europe centers on its nature. From one perspective, partisanship is seen as grounded in factors such as ratings of government performance and agreement with the party's issue stances. We refer to…	APOL	SUR
J	Hager, Anselm; Hermle, Johannes; Hensel, Lukas; Roth, Christopher	Does Party Competition Affect Political Activism?	2021	JOURNAL OF POLITICS	party activism; electoral competition; field experiment; campaigns	Does party competition affect political activism? This paper studies the decision of party supporters to join political campaigns. We present a framework that incorporates supporters' instrumental and expressive motives and illustrates that party competition can either increase or decrease party activism. To distinguish between these competing predictions, we implemented a field experiment with a…	x	SUR
J	Lemor, Antoine; Montpetit, Eric	Exploring the role of uncertainty, emotions, and scientific discourse during the COVID-19 pandemic	2024	POLICY AND SOCIETY	uncertainty; emotions and evidence; evidence and policy; emotions in policymaking; COVID-19	This article examines the interplay between uncertainty, emotions, and scientific discourse in shaping COVID-19 policies in Quebec, Canada. Through the application of natural language processing (NLP) techniques, indices were developped to measure sentiments of uncertainty among policymakers, their negative sentiments, and the prevalence of scientific statements. The study reveals that while sent…	PPR	QTA
J	Wallner, Jennifer	Legitimacy and public policy: Seeing beyond effectiveness, efficiency, and performance	2008	POLICY STUDIES JOURNAL	policy failure; legitimacy; policy incubation; emotive appeals; stakeholder engagement	Studies of failure typically assess public policies through the lenses of effectiveness, efficiency, and performance. Here I wish to propose a further dimension to the evaluation and assessment of policy failure-legitimacy. The substantive elements of public policies and the procedural steps taken by authoritative decision makers during the policy cycle affect the perception of policy legitimacy …	PCOMM	CAS
J	Highton, Benjamin; Kam, Cindy D.	The Long-Term Dynamics of Partisanship and Issue Orientations	2011	JOURNAL OF POLITICS		Partisanship and issue orientations are among the foundational concepts for behavioral researchers. We seek to understand their causal relationship. One view suggests that party identification, as a central and long-standing affective orientation, influences citizens' issue positions. Another view claims that issue orientations influence party identification. We take both theories into account in…	x	SUR
J	Gerber, Alan S.; Huber, Gregory A.; Doherty, David; Dowling, Conor M.	Personality and the Strength and Direction of Partisan Identification	2012	POLITICAL BEHAVIOR	Personality; Party identification; Partisan strength; Big Five	We examine the associations between personality traits and the strength and direction of partisan identification using a large national sample. We theorize that the relationships between Big Five personality traits and which party a person affiliates with should mirror those between the Big Five and ideology, which we find to be the case. This suggests that the associations between the Big Five a…	x	SUR
J	Chang, Yung-Yung	China beyond China, establishing a digital order with Chinese characteristics: China's growing discursive power and the Digital Silk RoadPalabras Clave(sic)(sic)(sic)	2023	POLITICS & POLICY	belt and road initiative; BRI; Digital Silk Road; DSR; international relations; soft power; tech-enabled authoritarianism; Transsion Holdings; world order	This article examines China's discursive power, placing it in the broader context of China's increasing assertiveness in the global arena. I argue that exporting the China model farther afield is the key for China to exert its discursive power. The mechanism to do this lies in two essential and decisive auxiliaries that flank China's soft discursive power: technological development/innovation and…	x	DISC
J	Ayhan, Kadir Jun; Snow, Nancy	Introduction to the special issue-Global Korea Scholarship: Empirical evaluation of a non-Western scholarship program from a public diplomacy perspective	2021	POLITICS & POLICY	Asia; exchanges; Global Korea Scholarship; international student mobility; P&P Special Issue; public diplomacy; South Korea	Most governments offer scholarships for international students as part of their public diplomacy toolbox. However, empirical assessments of these programs are relatively rare. The limited number of existing works often concern Western countries, while international student mobility programs in non-Western countries remain insufficiently researched. This special issue addresses these two gaps in t…	x	META
J	Xu, Alice Z.	Segregation and the Spatial Externalities of Inequality: A Theory of Interdependence and Public Goods in Cities	2024	AMERICAN POLITICAL SCIENCE REVIEW		Conventional wisdom claims that racial diversity undermines public goods provision. I show that class-based differences, instead, incentivize cooperation for public goods. Class-based segregation reduces spatial externalities of inequality (e.g., sewage pollution and crime) spilling over from impoverished areas (e.g., slums) to the middle class. Conversely, I argue that in integrated (de-segregat…	x	SUR
J	Orr, Lilla V.; Huber, Gregory A.	The Policy Basis of Measured Partisan Animosity in the United States	2020	AMERICAN JOURNAL OF POLITICAL SCIENCE		Understanding and addressing the consequences of partisan animosity requires knowledge of its foundations. To what extent is animosity between partisan groups motivated by dislike for partisan outgroups per se, policy disagreement, or other social group conflicts? In many circumstances, including extant experimental research, these patterns are observationally equivalent. In a series of vignette …	x	EXP
J	Oder, Noah; Beland, Daniel	Artificial intelligence, emotional labor, and the quest for sociological and political imagination among low-skilled workers	2024	POLICY AND SOCIETY	future of work; low-skilled workers; labor market policy; sociological imagination; emotional labor; generative AI	This study examines how generative AI impacts low-skilled workers in their daily professional lives, how it changes the nature of their work, and what, if any, strategies they develop to cope with this new reality. Emphasis is placed on call center agents-an occupational group facing a particularly high automation risk. Drawing on Constructivist Grounded Theory and semistructured interviews in an…	x	INT
J	Kuhlmann, Johanna; Starke, Peter	The politics of anger: emotional appraisal mechanisms and the French pension reform protests	2025	POLICY AND POLITICS	pension reform; France; emotion; anger; protest; social policy; welfare state; retrenchment	In this article, using the French pension reform in 2020 as a case, we demonstrate how a focus on emotions helps us to better understand important policy dynamics. While existing approaches of welfare state reform typically focus on rational-materialist and institutionalist approaches, we use appraisal theory of emotion to explain how the reform project and process on the one hand and interest gr…	BEHAV	x
J	Banks, Antoine J.	Are Group Cues Necessary? How Anger Makes Ethnocentrism Among Whites a Stronger Predictor of Racial and Immigration Policy Opinions	2016	POLITICAL BEHAVIOR	Ethnocentrism; Emotions; Racial and immigration policy opinions	Research shows that group conflict sets ethnocentric thinking into motion. However, when group threat is not salient, can ethnocentrism still influence people's political decision-making? In this paper, I argue that anger, unrelated to racial and ethnic groups, can activate the attitudes of ethnocentric whites and those that score low in ethnocentrism thereby causing these attitudes to be a stron…	PPR	SUR
J	Marston, Greg; Banks, Marcus; Zhang, Juan	The role of human emotion in decisions about credit: policy and practice considerations	2018	CRITICAL POLICY STUDIES	Credit; debt; financial literacy programs; governance; payday lending	The emotional and moral context of high cost, small loan lending has an important bearing on how low-income people engage in the mixed economy of credit, which is a term used to describe the different sectors involved in providing credit, from informal transactions between family and friends to formal fringe financial lenders and multinational banks. Decisions about accessing credit are constrain…	BEHAV	x
J	Skonieczny, Amy	Emotions and Political Narratives: Populism, Trump and Trade	2018	POLITICS AND GOVERNANCE	economic nationalism; emotions; identity; narratives; populism; trade; Trans-Pacific Partnership; Trump; US foreign policy	In 2016, a wave of American populism triggered emotional reactions to issues like trade and immigration, and dramatically impacted the Obama administration's plans to ratify the Trans-Pacific Partnership (TPP) during President Obama's final year in office. This article asks how do emotions infuse populism with political power, and why was populism effective in sparking American economic nationali…	PCOMM	QCA
J	Flinders, Matthew; Hinterleitner, Markus	The Politics of Blame-Seeking: Strategic Antagonism, Effective Alignment and Benefitting From Backlash	2024	POLITICAL STUDIES	polarization; blame; populism; backlash; credit	Why would a politician ever want to be blamed? Under what contextual conditions might blame-seeking behaviour emerge as a rational strategy? What tactics, tools and strategies might they deploy? Where is the empirical evidence of blame-seeking in action and why does it matter? These are the questions this article engages with as it challenges the long-standing 'self-evident truth' within politica…	THE; PCOMM	CON
J	Celermajer, Danielle	Distributed agency, responsibility and preventing grave wrongs	2020	CONTEMPORARY POLITICAL THEORY	distributive agency; new materialist theory; actor network theory; torture; Spinoza; affect	Despite the theoretical uptake of ontological schemas that do not tie agency uniquely to individual humans, these new ontological geographies have had little penetration when it comes to designing institutions to prevent grave wrongs. Moreover, our persistent intuitions tie agency and responsibility to individuals within a figuration of blame. This article seeks to connect new materialist and act…	THE	CON
J	Bartha, Attila; Boda, Zsolt; Szikra, Dorottya	When Populist Leaders Govern: Conceptualising Populism in Policy Making	2020	POLITICS AND GOVERNANCE	congruence; Hungary; policy making; political parties; populism; social policy	The rise of populist governance throughout the world offers a novel opportunity to study the way in which populist leaders and parties rule. This article conceptualises populist policy making by theoretically addressing the substantive and discursive components of populist policies and the decision-making processes of populist governments. It first reconstructs the implicit ideal type of policy m…	THE; PCOMM	CON
J	Bates, Geoff; Ayres, Sarah; Barnfield, Andrew; Larkin, Charles	What types of health evidence persuade policy actors in a complex system?	2023	POLICY AND POLITICS	evidence based policy; EBP; complex systems; systems thinking; public health policy; urban development; urban policy; UK	The aim of this article is to explore the types of health evidence that diverse actors find most persuasive in a complex policy system. The impact of evidence depends on many factors, including how it is presented and translated to audiences. If diverse actors are to address complex health challenges collectively, it helps if they can draw on evidence that is accessible and meaningful to all. We …	PCOMM	INT
J	Boullosa, Rosana de Freitas; Pereira Peres, Janaina Lopes	The democratic transformation of public policy through community activism in Brazil	2022	POLICY AND POLITICS	public policy; civil society; democratic transformation; transformational change; community activism; deliberative empowerment; Parais?polis; COVID-19	This article explores transformational change in public policy through community-based governance and the collective design of experience-oriented policy and action. Using a critical -interpretive theoretical perspective, we derived three key lessons in achieving this change from the experience of Parais??polis, a Brazilian favela made famous for its COVID-19 successful response plan, despite his…	x	CAS
J	Opperhuizen, Alette Eva; Klijn, Erik Hans; Schouten, Kim	How do media, political and regulatory agendas influence one another in high risk policy issues?	2020	POLICY AND POLITICS	media attention; political attention; risk policy; regulation; agenda setting; implementation; social amplification; supervised-machine learning	This article shows how an emerging risk is covered by the media and how this interacts with political attention and policy implementation. Gas drilling has resulted in earthquakes in the Netherlands over the past 25 years. We show that an increase in the frequency and magnitude has not stimulated greater media attention. Media and political attention increased only after the media had interpreted…	PCOMM	QTA
J	Burge, Camille D.; Johnson, Gbemende	Race, crime, and emotions	2018	RESEARCH & POLITICS	African-American politics; crime; intergroup conflict; emotions; shame; anger	Experimental research on racial attitudes examines how Whites' stereotypes of Black Americans shape their attitudes about the death penalty, violent crime, and other punitive measures. Marginally discussed in the race-to-crime literature are Blacks' perceptions of retribution and justice. We fill this void by using an original survey experiment of 900 Black Americans to examine how exposure to in…	PPR	SUR
J	Lynggaard, Kennet	Exploring the emotional appeal of green and social Europe myths among pan-European Union organizations	2017	JOURNAL OF EUROPEAN PUBLIC POLICY	Europe 2020; green Europe; NGOs; political emotions; political myths; social Europe	This article aims to advance European integration research by exploring the emotional appeal of political myths in day-to-day European Union politics with a special focus on the reception and reproduction of myths among pan-European Union non-governmental organizations. I investigate myths associated with EUROPE 2020: a European strategy for smart, sustainable and inclusive growth', adopted in ea…	PCOMM	QCA
J	KOYANAGI, C	IS THERE A NATIONAL POLICY FOR CHILDREN AND YOUTH WITH SERIOUS EMOTIONAL DISTURBANCE	1994	POLICY STUDIES JOURNAL		This article examines the status of a national mental health policy for children in need of mental health services. The need for systems planning and services integration involving multiple agencies is presented. The different programs of the major governmental agencies involved in the delivery of services to children are reviewed, as are the range of services provided. This article demonstrates …	x	x
J	Karl, Kristyn L.; Cormack, Lindsey	Big Boys Don't Cry: Evaluations of Politicians Across Issue, Gender, and Emotion	2023	POLITICAL BEHAVIOR	Gender; Emotion; Stereotype; Political evaluation; Partisanship	Emotional appeals are powerful motivators of political action. Yet the gender of a politician and the existing stereotypes held by audiences complicate the determination of which type of emotional appeal is best suited for different issue areas. In what ways do politicians' emotional appeals serve to mitigate or exacerbate the impact of gender stereotypes across different policy domains? This res…	PCOMM	SUR
J	Sanchez Salgado, Rosa	Emotions in European parliamentary debates: Passionate speakers or un-emotional gentlemen?	2021	COMPARATIVE EUROPEAN POLITICS	Emotions; European Politics; European Parliament; Refugee crisis; Economic crisis	This article analyses the verbal display and role of emotions in the European Parliament (EP). Contributing both to European Studies and Parliamentary studies, this article shows how emotions are expressed and how they reflect power and status dynamics. Emotions are indeed used differently depending on the power position of Members of the EP (MEPs). This article also reveals that emotions may pla…	PCOMM	DISC
J	Pace, Michelle; Bilgic, Ali	Studying Emotions in Security and Diplomacy: Where We Are Now and Challenges Ahead	2019	POLITICAL PSYCHOLOGY	emotions; diplomacy; International Relations; security; affect	The core objective of this special issue has been to shed light on emotions as (1) frames that shape interpersonal diplomatic relations, (2) as key tools that are used as part of the statecraft's toolbox, and (3) as formative/productive dynamics with real effects on human beings-that, in turn, often construct and maintain conflicts. It is therefore pertinent that we interrogate the political psyc…	THE; PCOMM	META
J	Stanley, Elizabeth A.; Larsen, Kelsey L.	Emotion Dysregulation and Military Suicidality Since 2001: A Review of the Literature	2019	POLITICAL PSYCHOLOGY	emotion dysregulation; emotion regulation skill building; military; suicide; suicide prevention	Policy makers and researchers have worked to explain the perplexing rise in U.S. military suicides since 2001, with little progress in explaining this widespread phenomenon. This article synthesizes several literatures to highlight the role of emotion dysregulation in military suicidality. After considering advances in suicidal ideation-to-action frameworks and the factors that contribute to the …	x	META
J	Collins, Stephanie	'The Government Should Be Ashamed': On the Possibility of Organisations' Emotional Duties	2018	POLITICAL STUDIES	normative theory; emotions; organisations; feelings; duties	When we say that 'the government should be ashamed', can we be taken literally? I argue that we can: organisations have duties over their emotions. Emotions have both functional and felt components. Often, emotions' moral value derives from their functional components: from what they cause and what causes them. In these cases, organisations can have emotional duties in the same way that they can …	THE	CON
J	Salgado, Rosa Sanchez	The Advocacy of Feelings: Emotions in EU-Based Civil Society Organizations' Strategies	2018	POLITICS AND GOVERNANCE	civil society organizations; emotions; European Union; feelings; interest groups	European Union (EU)-based Civil Society Organizations (CSOs) are usually pictured as well-established professionalized actors basing their advocacy strategies on the provision of expertise. Does the focus on expertise imply the removal of emotions and feelings from political communication? Following the emotion turn in social movement and collective action studies, this article investigates how a…	PCOMM	QCA; INT
J	Erisen, Cengiz; Villalobos, Jose D.	Exploring the invocation of emotion in presidential speeches	2014	CONTEMPORARY POLITICS	political communication; speeches; rhetoric; emotions; presidents	Scholars have long explored why presidential rhetoric is important and how it matters for public leadership and policy-making. However, relatively few works have considered the role that emotion plays in leadership communication and no research has conducted a thorough examination of the various types of emotions invoked in presidential rhetoric, their frequency, or how they have shaped president…	PCOMM	QCA
J	Miller, Patrick R.	The Emotional Citizen: Emotion as a Function of Political Sophistication	2011	POLITICAL PSYCHOLOGY	appraisal; emotion; Iraq War; latency; sophistication; voting	Scholars and popular commentators have often stereotyped emotion as a tool that citizens use to reason about politics in place of hard fact and critical thought. Indeed, critics have often seen emotion as a potentially dangerous force that can sway the unsophisticated masses to undesirable ends. This article challenges the view that emotion is an outgrowth of low sophistication, arguing that high…	BEHAV	SUR
J	Valentino, Nicholas A.; Gregorowicz, Krysha; Groenendyk, Eric W.	Efficacy, Emotions and the Habit of Participation	2009	POLITICAL BEHAVIOR	Participation; Emotions; Efficacy; Threat; Behavior; Habit	Political behavior is triggered by the presence of a variety of material and cognitive resources, including political efficacy. The dominant view conceptualizes efficacy as capital, used to overcome obstacles to participation. Our theory suggests that unlike other resources, efficacy aids in the development of habitual participation by activating a particular negative emotion, anger. Using the 19…	BEHAV	SUR
J	van Hoef, Yuri; O'Connor, Ryan	Sentimental Utility Theory: Interpreting the Utilization of Collective Emotions by the Political Elite Through the Erdogan-Obama Friendship	2019	POLITICAL PSYCHOLOGY	Turkey; United States; Obama; Erdogan; collective emotions; friendship	Barack Obama's 2009 visit to Turkey resulted in an Obama-Mania in Turkish media, followed by a friendship between Obama and Recep Erdogan, which was widely reported in the media and emphasized in their rhetoric. This article explains the existence of the Erdogan-Obama friendship narrative, in spite of no actual political friendship existing. We first interpret their relationship through five key …	THE; BEHAV	CON
J	Larios, Lindsay; Paterson, Stephanie	Fear of the other: vulnerabilization, social empathy, and the COVID-19 pandemic in Canada	2021	CRITICAL POLICY STUDIES	Emotional policy analysis; social empathy; COVID-19; Canada; migrant workers; vulnerability	In this paper, we use the Empathic Policy Framework to explore the concept of vulnerability in the context of the COVID-19 pandemic. We argue that vulnerability is not a state of being, but rather an effect produced by emotional policy discourse. As a result, people are not inherently 'vulnerable', but rather 'vulnerabilized'. We make this claim by exploring the potential of the EPF to illuminate…	PCOMM	x
J	Miller, Hugh T.	Narrative subscription in public policy discourse	2019	CRITICAL POLICY STUDIES	Narrative subscription; ideograph; context; connotation; cannabis; marijuana	Affect and identity are often recognized as important considerations in critical policy studies. But because these notions lack materiality, it is not observably obvious how they function in policy discourse. Their function can be understood by adopting the concept of narrative subscription. This conceptualization raises the prominence of narrative, treating it as the key observable feature of a …	PCOMM	CON
J	Ilgit, Asli; Prakash, Deepa	Making Human Rights Emotional: A Research Agenda to Recover Shame in Naming and Shaming	2019	POLITICAL PSYCHOLOGY	emotions; human rights; NGOs; naming and shaming; shame	Shame is an emotion that is the cornerstone of International Relations (IR) human rights scholarship but remains undertheorized from an explicitly emotional perspective. Given the dubious and unsettled efficacy of human rights naming and shaming campaigns, in this article, we outline the theoretical and methodological contours of a research agenda designed (1) to uncover the emotional content of …	THE	CON
J	Lipsitz, Keena	Playing with Emotions: The Effect of Moral Appeals in Elite Rhetoric	2018	POLITICAL BEHAVIOR	Campaigns and elections; Political advertising; Ideology; Campaign strategy; Emotional appeals; Moral language; Moral Foundations Theory	This study argues that moral appeals in political advertising-and political rhetoric in general-are a form of emotional appeal that political elites use strategically. In particular, the study shows that moral appeals in political ads elicit a strong emotional response from voters and that it is precisely through an adjustment in their use of moral appeals that candidates signal their moderation …	PCOMM	QTA
J	Warner, Jo	Emotional Interest Representation and the Politics of Risk in Child Protection	2018	POLITICS AND GOVERNANCE	child protection; emotion; Members of Parliament; representation; risk; social work	This article explores the emotional dimensions of political representation by British Members of Parliament (MP) in relation to child protection. The public speech acts and first-hand accounts of three MPs are drawn upon as examples. These highlight different forms of emotional interest representation that arise following the death of a local child from severe abuse or neglect and in response to …	PCOMM	INT; QCA
J	Johnson, Genevieve Fuji; Black, Laura W.; Knobloch, Katherine R.	Citizens' Initiative Review process: mediating emotions, promoting productive deliberation	2017	POLICY AND POLITICS	Citizens' Initiative Review; citizen engagement; deliberative democracy; emotions	The interplay between emotion and reason is of interest to scholars of deliberative democracy, yet it has been little analysed. Examining a 2010 Citizens' Initiative Review (CIR) in Oregon, USA, we find (1) that the participation of chief petitioners,.advocates and witnesses is conducive to the expression of emotions and (2) that, aided by moderators, panellists remain focused on clarifying key p…	PCOMM	x
J	Maor, Moshe	Policy overreaction	2012	JOURNAL OF PUBLIC POLICY	Coordination; emotions; groupthink; overconfidence; overreaction; risk	The literature on policy success and failure does not capture policies that may be too successful, as well as too much'' and/or too soon'' patterns of policy. To bridge this gap, this conceptual article relies on one of the most robust findings in the psychology of judgement, namely that many people are overconfident, prone to place too much faith in their intuitions. Based on this premise, the a…	x	CON
J	Hartman, Todd K.	Toll Booths on the Information Superhighway? Policy Metaphors in the Case of Net Neutrality	2012	POLITICAL COMMUNICATION	metaphor; persuasion; policy; net neutrality; experiment	Scholars have argued for centuries that metaphors are persuasive in politics, yet scant experimental research exists to validate these assertions. Two experiments about the issue of federally regulating the Internet were conducted to test whether metaphors confer a unique persuasive advantage relative to conventional messages. The results of these studies confirm that an apt metaphor can be a pow…	PPR	EXP
J	Hourcade, Renaud	Emotions, narratives, and the art of making meanings: Nantes' memorial to the abolition of slavery	2021	CRITICAL POLICY STUDIES	Interpretive studies; memory politics; ethics; race relations; local policies; architecture	This paper discusses the role and use of emotion in public policy. Approaching emotions from the standpoint of narrative analysis, it offers a detailed account of the way emotions were storied and enrolled in a specific local policy process: the construction of a memorial to the abolition of slavery between 1998 and 2012 in Nantes, France, a former slave trade port. The article finds evidence tha…	PCOMM	CAS
J	Valentino, Nicholas A.; Brader, Ted	THE SWORD'S OTHER EDGE PERCEPTIONS OF DISCRIMINATION AND RACIAL POLICY OPINION AFTER OBAMA	2011	PUBLIC OPINION QUARTERLY		This study explores the impact of a momentous political event, the election of the nation's first black president, Barack Obama, in 2008, on perceptions of racism and opinions about racial policy. A representative panel study of Americans interviewed immediately before and after the election reveals a roughly 10 percent decline in perceptions of racial discrimination. About one quarter of respond…	ATT	SUR
J	Jacobs, K; Kemeny, J; Manzi, T	Privileged or exploited council tenants? The discursive change in conservative housing policy from 1972 to 1980	2003	POLICY AND POLITICS		The process of social construction in which competing and sometimes contradictory definitions contend with one another plays a decisive part in policy making. justifications for policy intervention often require a narrative identifying villains or victims to delineate creatively a 'social problem' that needs to be addressed by appropriate measures. This article shows how contrasting political and…	PCOMM	x
J	MATAVA, M	THE IMPLICATIONS OF PARENTING STANDARDS IN CHILD PROTECTION - A PARADOX IN DISABILITY POLICY	1994	POLICY STUDIES JOURNAL		Contemporary parenting standards in the field of child protection produce a paradox in disability policy. Focusing on the protections necessary for child safety, child protection workers are apt stereotypically to discount the abilities of parents with disabilities to raise their children. This situation runs a wide spectrum. It includes parents fully capable of parenting with no outside assistan…	x	x
J	Rojas-Padilla, Eduardo; Metze, Tamara; Dewulf, Art	Cliquepolitik: Multimodal online discourse coalitions on CRISPR-Cas genome editing technology	2024	REVIEW OF POLICY RESEARCH	CRISPR-Cas; discourse coalition; genome editing; multimodal framing; online public debate; policy controversies; technological governance	The influence of visualizations on decision-making about controversial policy issues is increasingly recognized in the political and policy sciences. In this paper, we explore how combinations of visuals and text on Twitter (now X) lead to the formation of networks of actors sharing similar textual and visual framings about a policy issue in an online setting, which we conceptualize as Multimodal…	PCOMM	DISC
J	Joslyn, Mark R.; Haider-Markel, Donald P.	The direct and moderating effects of mass shooting anxiety on political and policy attitudes	2018	RESEARCH & POLITICS	Emotions; anxiety; public opinion; guns; shooting; terrorism	In this article, we examine the effects of individual anxiety after the 2016 Orlando, Florida, mass shooting, which killed 49 people and wounded 58 others. Similar to prior research on the influence of anxiety, after the Orlando shooting anxious citizens supported policies and institutions perceived as protective and capable of minimizing future risks. In addition, anxiety counteracted ideology. …	PPR	SUR
J	Myers, C. Daniel	Issues, Groups, or Idiots? Comparing Theories of Partisan Stereotypes	2023	PUBLIC OPINION QUARTERLY		When individuals picture the two parties, what do they think of? Given the dominant understanding of partisanship as a social identity, understanding the content of these mental images-individuals' stereotypes of the two parties-is essential, as stereotypes play an important role in how identity affects attitudes and behaviors, perceptions of others, and inter-group relations. The existing litera…	x	SUR
J	Banks, Antoine J.; Hicks, Heather M.; Merolla, Jennifer L.	Emotionally Coping with Terrorism	2022	PUBLIC OPINION QUARTERLY		Individuals often experience anger after exposure to news about a terrorist attack. Are the coping strategies available to them effective in reducing anger, and with what consequences for policy attitudes? We argue that because terrorism is a complex problem, people should feel better distancing themselves from the threat than engaging in confrontive strategies against it, and this should lead to…	PPR	SUR
J	Banks, Antoine J.; Valentino, Nicholas A.	Emotional Substrates of White Racial Attitudes	2012	AMERICAN JOURNAL OF POLITICAL SCIENCE		A steep decline in biologically based racial animus over the past four decades has not led to a softening of opposition to race-conscious policies such as affirmative action. One explanation for this is that a new racial belief system-referred to as symbolic racism or racial resentment-has replaced old-fashioned racism. Another is that nonracial values such as ideology and a preference for small …	PPR	SUR
J	Mastroianni, Laura; Profeti, Stefania	How to talk about crises? Leaders' narrative strategies during the COVID-19 vaccination campaign in Italy and France	2025	POLICY STUDIES JOURNAL	COVID-19; crisis leadership; policy narratives; (sic)(sic)(sic)(sic)(sic); (sic)(sic)(sic)(sic); (sic)(sic)(sic)(sic); Liderazgo en situaciones de crisis; narrativas pol & iacute;ticas	Defined by threat, urgency, and uncertainty, crises produce opportunities for government leaders to exploit and create meaning around their policy decisions in such unstable circumstances. In narrating their preferred policy solutions, one of the tools governments can use is relying on evidence-based information. However, some studies have also stressed the importance of recovering emotional inpu…	PCOMM	DISC
J	Durnova, Anna	Unpacking emotional contexts of post-truth.	2019	CRITICAL POLICY STUDIES	Discourse; emotions; post-truth; science denial; social constructivism		THE	CON
J	Klar, Samara; Piston, Spencer	The influence of competing organisational appeals on individual donations	2015	JOURNAL OF PUBLIC POLICY	donation behaviour; emotions; experiment; identity; nonprofit	Policy scholars and the public alike are concerned not only with the actions policymakers take in the legislature but also with the money that enables policies to reach the legislative agenda. A significant portion of these funds come from individual donors. We examine how appeals from public policy organisations influence donation behaviour. Existing research studies the effectiveness of appeals…	x	EXP
J	Obaidi, Milan; Bergh, Robin; Sidanius, Jim; Thomsen, Lotte	The Mistreatment of My People: Victimization by Proxy and Behavioral Intentions to Commit Violence Among Muslims in Denmark	2018	POLITICAL PSYCHOLOGY	extremism; victimization by proxy; social identity; group-based injustice and emotion; Western foreign policy	Islamist extremism is often explained by the suffering endured by Muslims in Islamic countries as a result of Western-led wars. However, many terrorist attacks have been carried out by European Muslims with no personal experiences of war. Across two studies among Danish Muslims, we tested if what we call victimization-by-proxy processes motivate behavioral intentions to commit acts of violence. W…	BEHAV	SUR
J	Vandenhole, Kimberley; Bauler, Tom; Block, Thomas	'How dare you!': a conceptualization of the eco-shaming discourse in Belgium	2024	CRITICAL POLICY STUDIES	Eco-shaming; eco-shame; green shame; environmental discourse; environmental policy; flight shaming	The rise of Greta Thunberg, the Swedish 'flygskam' (flight shame) movement, and school strikes for climate: the context for apprehending environmental affairs changed significantly in 2018, enabling the construction of a new environmental discourse of which practices of eco-shaming and emotions of eco-shame are visible expressions. This paper conceptualizes this 'eco-shaming' discourse by exposin…	PCOMM	DISC
J	Gross, Kimberly; Wronski, Julie	Helping the Homeless: The Role of Empathy, Race and Deservingness in Motivating Policy Support and Charitable Giving	2021	POLITICAL BEHAVIOR	Emotion; Race; Deservingness	What will motivate citizens to support efforts to help those in need? Charitable organizations seeking support for their cause will often use the story of a specific individual to illustrate the problem and generate support. We explore the effectiveness of this strategy using the issue of homelessness. Specifically, we examine the role that the race of beneficiaries featured in a message, and the…	PCOMM	SUR
J	Crabtree, Charles; Golder, Matt; Gschwend, Thomas; Indridason, Indridi H.	It Is Not Only What You Say, It Is Also How You Say It: The Strategic Use of Campaign Sentiment	2020	JOURNAL OF POLITICS	party strategy; election campaign; campaign sentiment; emotion; language	What explains the type of electoral campaign run by political parties? We provide a new perspective on campaigns that focuses on the strategic use of emotive language. We argue that the level of positive sentiment parties adopt in their campaigns depends on their incumbency status, their policy position, and objective economic conditions. We test these claims with a novel data set that captures t…	PCOMM	QTA
J	Moerland, Anke; Weinhardt, Clara	Politicization 'Reversed': EU Free Trade Negotiations with West Africa and the Caribbean	2020	POLITICS AND GOVERNANCE	deep integration; European Union; EU trade policy; Free Trade Agreement; non-state actors; politicization; trade negotiations; West Africa	The politicization of recent European Union (EU) trade negotiations such as the Transatlantic Trade and Investment Partnership or the Comprehensive and Economic Trade Agreement suggests that the more negotiations focus on deep integration issues, the higher the potential for polarization of values and interests. Yet, as we argue, this pattern does not necessarily hold true in EU trade negotiation…	PCOMM	CAS
J	Clifford, Scott; Wendell, Dane G.	How Disgust Influences Health Purity Attitudes	2016	POLITICAL BEHAVIOR	Disgust; Emotion; Health; Purity; Food; Natural; Organic; Vaccination	Food and health regulations are increasingly being pushed onto the political agenda, with rising concerns about genetically modified foods, obesity rates, and vaccination. Public beliefs and attitudes on these issues often conflict with the scientific evidence, yet we know relatively little about what influences opinion on these issues. The public lacks clear partisan cues, and many food and heal…	ATT	SUR
J	Albert, Zachary; Costa, Mia	Winning At All Costs? How Negative Partisanship Affects Voter Decision-Making	2024	POLITICAL BEHAVIOR		Do voters who dislike the other side prefer candidates who can win, even if they are less representative? Negative partisanship is an important feature of American politics, but few scholars have examined its relationship to voter decision-making. We argue that negative partisanship shapes how voters prioritize candidate electability and substantive representation. Using two conjoint experiments,…	x	SUR
J	Schroeder, Martin; Braun, Daniela; Grimm, Katrin Luisa; Ulrich, Martin; Wenzelburger, Georg	A matter of time, not generations: rising emotional attachment to the European Union 1991-2023. An age period cohort analysis	2024	JOURNAL OF EUROPEAN PUBLIC POLICY	Attitudes; European Union; European identity; generation effects; period effects; age period cohort analysis	The literature argues that successive generations have become progressively more attached to the EU, due to having experienced increasing levels of integration during their impressionable adolescent years. This generational view of EU attachment assumes that after birth cohorts have outgrown their impressionable years, they do not become more attached to the EU, regardless of period-based changes…	ATT	SUR
J	Pearlman, W. E. N. D. Y.	Emotional Sensibility: Exploring the Methodological and Ethical Implications of Research Participants' Emotions	2023	AMERICAN POLITICAL SCIENCE REVIEW		Although political science increasingly investigates emotions as variables, it often ignores emotions' larger significance due to their inherence in research with human subjects. Integrating emotions into conversations on methods and ethics, I build on the term ethnographic sensibility to conceptualize an emotional sensibility that seeks to glean the emotional experiences of people who participat…	THE	CON
J	Clifford, Scott; Jerit, Jennifer; Rainey, Carlisle; Motyl, Matt	Moral Concerns and Policy Attitudes: Investigating the Influence of Elite Rhetoric	2015	POLITICAL COMMUNICATION	elite rhetoric; framing; Moral Foundations Theory; persuasion; stem cell research	A growing body of research documents the crucial role played by moral concerns in the formation of attitudes and a wide range of political behaviors. Yet extant models of moral judgment portray a direct linkage between moral intuitions and policy attitudes, leaving little room for the influence of political context. In this article, we argue that political rhetoric plays an important role in faci…	PPR	SUR
J	Krupnikov, Yanna	Overcoming Biases and Bridging Gaps: The Democratic Dilemma's Perspective of Hope	2019	PS-POLITICAL SCIENCE & POLITICS			APOL	CON
J	Turnbull, Nick; Broad, Rose	Bringing the problem home: The anti-slavery and anti-trafficking rhetoric of UK non-government organisations	2022	POLITICS	distance; human trafficking; modern slavery; policy framing; rhetoric	Rhetoric is a way to explain policy problem framing by recognising the practical necessity to persuade audiences in contextual situations. Modern slavery and human trafficking is a complex and emotive problem, simplified through rhetorical demands to motivate an audience of supporters. This article analyses rhetoric by 212 UK anti-trafficking and anti-slavery non-government organisations (NGOs) t…	PCOMM	QTA
J	Banks, Antoine J.; Hicks, Heather M.	Fear and Implicit Racism: Whites' Support for Voter ID laws	2016	POLITICAL PSYCHOLOGY	emotions; racism; voter ID laws; public opinion	Oftentimes, Whites are unaware that they may have slighted Blacks. Although researchers have spent a considerable amount of attention disentangling this form of implicit (unconscious) racial bias from explicit (conscious) racial bias, we are less clear about the conditions that cause implicit racism to matter in American politics. In this article, we offer a theory of how fear and Whites' unconsc…	PPR	EXP
J	Nai, Alessandro	What really matters is which camp goes dirty: Differential effects of negative campaigning on turnout during Swiss federal ballots	2013	EUROPEAN JOURNAL OF POLITICAL RESEARCH	negative campaigning; turnout; emotions; direct democracy; Switzerland	Using individual data on Swiss federal ballots (VOX data) and an original dataset on the evolution and content of political campaigns, this article elucidates how negative campaigning influences individual turnout during Swiss federal ballots. It hypothesises that the effect of negativism on turnout depends on which camp goes dirty and, specifically, on the direction of the political campaign (st…	x	x
J	DAVIS, S	THE ROLE OF COMMUNICATION AND SYMBOLISM IN INTEREST GROUP COMPETITION - THE CASE OF THE SISKIYOU-NATIONAL-FOREST, 1983-1992	1995	POLITICAL COMMUNICATION	COMMUNICATION; ENVIRONMENTAL POLICY; INTEREST GROUPS; PUBLIC LANDS POLICY; SYMBOLISM	Traditionally, interest group competition has been analyzed in terms of the quantifiable resources opposing groups can muster in a given policy struggle. Others have argued that less quantifiable, less easily measured communicative variables are just as important, if not more so. This study proposes that communication and the effective use of symbols are indeed crucial and often overlooked aspect…	PCOMM	x
J	Barnes, M	Bringing difference into deliberation? Disabled people, survivors and local governance	2002	POLICY AND POLITICS	deliberate democracy; participation rules; disabled rules; disabled people; mental health service users/survivors	This article discusses the rules of the game in participatory democracy and the engagement of disabled people and mental health service users/survivors in the process. Drawing on theories of new social movements and of deliberative democracy, the article considers how notions of 'legitimate participants' are constructed within official discourse, and how those can be challenged by autonomous grou…	x	x
J	Zhu, Yuner; Cheng, Edmund W.; Shen, Fei; Walker, Richard M.	An Eye for an Eye? An Integrated Model of Attitude Change Toward Protest Violence	2022	POLITICAL COMMUNICATION	Attitudinal radicalization; protest violence; repression; emotion; computational methods; anti-extradition law amendment bill movement; Hong Kong	How political violence emerges, why people support it, and how authorities can address it without escalating further radicalization remain an ongoing debate. In this study, we develop a quantitative model to predict violence endorsement as a function of repression severity, group identification, and individual emotions. We situate our investigation in the context of the Anti-Extradition Law Amend…	BEHAV	QCA
J	Aaroe, Lene	Investigating Frame Strength: The Case of Episodic and Thematic Frames	2011	POLITICAL COMMUNICATION	frame strength; episodic; emotions; opinion formation; appraisal theory	An impressive body of research shows that the framing of an issue affects citizens' attitudes, but also that some frames are more influential than others. Yet, we have surprisingly limited knowledge of the factors that affect the strength of a frame, that is, the frame's capacity to influence citizens' opinions. Therefore, this study investigates the relative strength of episodic and thematic fra…	PCOMM	EXP
J	Bandelow, Nils C.; Hornung, Johanna; Schroder, Ilana	Stories, emotions, and governmental strategies	2024	REVIEW OF POLICY RESEARCH			x	META
J	Werner, Annika; Heinisch, Reinhard	Democracy Amid Pandemic: A Survey Experiment on How Covid-19 Affectedness Influences Support for Anti-Liberal Policies	2024	POLITICS AND GOVERNANCE	Austria; Covid-19 pandemic; crisis; democracy; public policy attitudes; survey experiment	Do people support ostensibly effective policy measures that curtail liberal rights and civil liberties or instead stick to liberal principles when confronted with an unprecedented crisis? This article examines the relationship between individuals' perceptions of the Covid-19 pandemic and their attitudes toward democracy as they consider effective countermeasures. It asks (a) whether individuals' …	PPR	SUR
J	Skurka, Chris	Will It Teach Them a Lesson? Validating a Measure of Retributive Efficacy in Social Issue Activism	2022	POLITICAL BEHAVIOR	Retributive efficacy; Validity; Policy support; Activism; Climate change; Childhood obesity	The public and policymakers have increasingly recognized the role that industry plays in contributing to societal issues, such as climate change and childhood obesity. In fact, many people now support punitive action against major corporations. The question then becomes: What beliefs factor into a person's willingness to take political action against industry actors? I argue that one important pr…	BEHAV	SUR
J	Adisonmez, Umut Can	When Conflict Traumas Fragment: Investigating the Sociopsychological Roots of Turkey's Intractable Conflict	2019	POLITICAL PSYCHOLOGY	traumatic memories; emotional performances; narrative; ontological security; imagined national agency; Turkish-Kurdish conflict	This article investigates the historical processes contributing towards the specific development of Turkey after the 1920s that in turn established the main contours of Turkey's conflict with the Partiya Karkeren Kurdistane (PKK). It first argues that the traumatic conflict memories of the Turkish leadership (1918-35) influenced its individual-level patterns of actions. These memories were used b…	PCOMM	DISC
J	Brandt, Mark J.	Onset and Offset Deservingness: The Case of Home Foreclosures	2013	POLITICAL PSYCHOLOGY	attributions; foreclosure; deservingness; emotions; political ideology	An examination of the debate surrounding foreclosure assistance suggests that arguments vary in the extent that they suggest people facing foreclosure deserve assistance and whether the cause of the foreclosure is at the onset or offset of the foreclosure situation. Results from an experiment using a nationally representative sample suggest that people use the attributional evidence provided by o…	PPR	EXP
J	Zebel, Sven; Zimmermann, Anja; Viki, G. Tendayi; Doosje, Bertjan	Dehumanization and guilt as distinct but related predictors of support for reparation policies	2008	POLITICAL PSYCHOLOGY	dehumanization; group-based guilt; reparation; policy attitudes; valence	In two studies, we predicted that support for reparation policies would be influenced positively by feelings of group-based guilt and negatively by dehumanization of the outgroup. We also hypothesized that a valence manipulation of the ingroup's behavior would cause differences in such support which would be mediated by guilt. In the first study, we manipulated the valence of past ingroup behavio…	PPR	EXP
J	SCHATZ, RT; FISKE, ST	INTERNATIONAL REACTIONS TO THE THREAT OF NUCLEAR-WAR - THE RISE AND FALL OF CONCERN IN THE EIGHTIES	1992	POLITICAL PSYCHOLOGY	LIKELIHOOD; CONCERN; POLICY PREFERENCES; INTERNATIONAL; NUCLEAR WAR	The threat of nuclear war was a substantial concern during the 1980s, not just in the United States but in Europe and the Soviet Union as well. This article reviews poll data and psychological literature investigating reactions to the nuclear threat in these three areas of the world. It documents the trends in likelihood estimates, concern, and policy preferences during the last decade and examin…	x	META
J	Druckman, James N.	How to study democratic backsliding	2023	POLITICAL PSYCHOLOGY		The twenty-first century has been one of democratic backsliding. This has stimulated wide-ranging scholarship on the causes of democratic erosion. Yet an overarching framework that identifies actors, behaviors, and decision processes has not been developed. I offer such a structure that includes elites (e.g., elected officials, the judiciary), societal actors (e.g., social movements, interest gro…	x	CON
J	Singh, Prerna	The Politics of Contagion: States, Societies, and the Control and Consequences of Infectious Diseases	2024	ANNUAL REVIEW OF POLITICAL SCIENCE	disease; health; vaccination; state-society relations; xenophobia; scapegoating	The study of contagion offers important but underexplored opportunities to rethink and advance our understanding of key concepts in political science. These include notably state capacity; social policy; state-society relations, especially the role of trust; nationalism and social solidarity; exclusionary dynamics, such as xenophobia, prejudice, and discrimination; and within political psychology…	THE	META
J	Orsini, Michael	Feeling critical: navigating the emotional worlds of COVID-19	2021	CRITICAL POLICY STUDIES			THE	x
J	Van Decreek, Drew E.	Strong Language: Mathew Carey, Sensibility, and the American State, 1819-1835	2021	JOURNAL OF POLICY HISTORY	American state-building; tariffs; protectionism; Mathew Carey; social welfare	Mathew Carey promoted the high tariff as a political expression of humane sentiments that relieved American workers of the misery caused by low wages and unemployment. This made him an early example of a state-builder working outside the state itself, building ideological frames and using emotional appeals to promote the expansion of state capacity. Although other aspects of his protectionism app…	PCOMM	x
J	Camarena, Kara Ross; Hagerdal, Nils	When Do Displaced Persons Return? Postwar Migration among Christians in Mount Lebanon	2020	AMERICAN JOURNAL OF POLITICAL SCIENCE		Under what conditions will forcibly displaced persons return to their original homes after wars end? We draw on theories of labor migration to show that even displaced persons who have positive feelings toward their original location may nevertheless choose to return as regular visitors rather than permanent residents unless the location offers attractive economic opportunities. Furthermore, we a…	BEHAV	QTA
J	Dunlop, Claire A.; Radaelli, Claudio M.	Teaching Regulatory Humility: Experimenting with Student Practitioners	2016	POLITICS	experiments; illusion of control; learning; public administration; regulation; regulatory humility	Donald Schon's assertion that becoming an effective professional requires more than technical rationality underpins the pedagogy of Masters in Public Administration (MPA) programmes. This article explores how public administrators can be taught to think reflectively and reflexively about the limits of control in the context of decision making and regulatory policy appraisal. It reports on an in-c…	BEHAV	EXP
J	Albertson, Bethany; Gadarian, Shana Kushner	Anxiety Over Terrorism Advantages Hillary Clinton	2016	POLITICAL COMMUNICATION	Election 2016; emotion; foreign policy		PCOMM	CON
J	Newman, Benjamin J.; Hartman, Todd K.; Taber, Charles S.	Social Dominance and the Cultural Politics of Immigration	2014	POLITICAL PSYCHOLOGY	cultural threat; social dominance orientation; transaction costs; immigration	We argue that conflict over immigration largely concerns who bears the burden of cultural transaction costs, which we define as the costs associated with overcoming cultural barriers (e.g., language) to social exchange. Our framework suggests that the ability of native-born citizens to push cultural transaction costs onto immigrant out-groups serves as an important expression of social dominance.…	BEHAV	EXP
J	Capelos, Tereza; Chrona, Stavroula; Salmela, Mikko; Bee, Cristiano	Reactionary Politics and Resentful Affect in Populist Times	2021	POLITICS AND GOVERNANCE	affect; emotions; populism; radicalism; reactionism; resentment	This thematic issue brings together ten articles from political psychology, political sociology, philosophy, history, public policy, media studies, and electoral studies, which examine reactionary politics and resentful affect in populist times.	x	META
J	Chudy, Jennifer	Racial Sympathy and Its Political Consequences	2021	JOURNAL OF POLITICS	racial attitudes; prejudice; emotions; public opinion; political psychology	Reversing course from a long tradition of studying racial antipathy, I argue that racial sympathy, defined as white distress over black misfortune, shapes public opinion among a nontrivial subset of white Americans. Using an original measure-the racial sympathy index-I find that sympathy motivates support for policies perceived to benefit, as well as opposition to policies perceived to harm, Afri…	PPR	EXP
J	Mehlhaff, Isaac D.; Ryan, Timothy J.; Hetherington, Marc J.; Mackuen, Michael B.	Where Motivated Reasoning Withers and Looms Large: Fear and Partisan Reactions to the COVID-19 Pandemic	2024	AMERICAN JOURNAL OF POLITICAL SCIENCE		Contemporary American politics has been largely characterized by hyperpartisanship and polarization, with partisan-motivated reasoning a thematic concern. Theories of emotions in politics suggest that anxiety might interrupt partisan heuristics and encourage citizens to reason more evenhandedly-but in what domains and to what extent? We use original panel data to assess how anxiety about becoming…	PPR; VOT	x
J	Wood, Matthew; Antova, Ivanka; Flear, Mark; Hervey, Tamara	What Do Left Behind Communities Want? A Qualitative Study in the United Kingdom using Photo Elicitation	2023	AMERICAN POLITICAL SCIENCE REVIEW		Recent shifts in political support to populist parties worldwide have been linked to the changing preferences of left behind communities. Based on apparently growing left behind support for populists, some commentators have argued for policy changes including tightened immigration rules coupled with increasing investment in economically deprived areas, particularly in health care. However, left b…	PPR	INT
J	Koehler, Daniel; Fiebig, Verena; Jugl, Irina	From Gaming to Hating: Extreme-Right Ideological Indoctrination and Mobilization for Violence of Children on Online Gaming Platforms	2023	POLITICAL PSYCHOLOGY	far right; radicalization; recruitment; children; video gaming platforms	As a consequence of numerous extreme-right terror attacks in which the perpetrators posted their manifestos and attack life streams on online platforms adjacent to the video gaming community, as well as radicalized within that environment to a significant degree (e.g., Christchurch, New Zealand; Halle, Germany), increasing scholarly and policymaker interest is focusing on far-right radicalization…	BEHAV	CAS
J	Boussaguet, Laurie; Faucher, Florence; Freudlsperger, Christian	Performing Crisis Management: National Repertoires of Symbolic Action and Their Usage during the Covid-19 Pandemic in Europe	2023	POLITICAL STUDIES	symbols; crisis management; public performance; repertoires of symbolic action; Covid-19 pandemic; leader persona	The role of the symbolic is often overlooked in the public policy literature. Yet, it is a key component of public action, particularly in crisis management. During the Covid-19 pandemic, all democratic states needed to carry out cognitive and emotional work to persuade their citizens to show solidarity and comply with heavy restrictions. The near-simultaneous occurrence of the pandemic's first w…	PCOMM	QCA
J	Rosler, Nimrod; Sharvit, Keren; Bar-Tal, Daniel	Perceptions of Prolonged Occupation as Barriers to Conflict Resolution	2018	POLITICAL PSYCHOLOGY	occupation; denial; barriers; conflict resolution; Israeli-Palestinian conflict	The goal of this research was to examine whether a denial of a prolonged occupation by the occupying society constitutes a meaningful sociopsychological barrier to resolving the conflict peacefully. We hypothesized that this perception will be associated with objections both to conflict resolution processes and to specific compromises intended to end the occupation. Furthermore, we hypothesized t…	ATT	SUR
J	Lee, Sheryn; Milner, Anthony	Practical vs. identity regionalism: Australia's APC initiative, a case study	2014	CONTEMPORARY POLITICS	regional community; identity regionalism; practical regionalism; Asia-Pacific Community; East Asia	On 4 June 2008 Australian Prime Minister Kevin Rudd announced his 'vision for an Asia Pacific community' (APC). Though failing to win support among Asian countries, the initiative offers a useful case study. This article does not focus on the motives and interests of the various governments responding to the proposal but rather on the different (and sometimes conflicting) understandings of region…	x	x
J	Hatemi, Peter; McDermott, Rose	Policing the Perimeter: Disgust and Purity in Democratic Debate	2012	PS-POLITICAL SCIENCE & POLITICS		We explicate the precise role that one specific emotion, disgust, plays in generating political acrimony. We do this by identifying the link between the different dimensions along which moral judgments are made by those espousing different political ideologies and the different emotions which undergird these evaluations. These assessments reliably track along liberal and conservative dimensions a…	BEHAV	META
J	Kaplan, Danny; Rosenmann, Amir	Unit Social Cohesion in the Israeli Military as a Case Study of Don't Ask, Don't Tell	2012	POLITICAL PSYCHOLOGY	gay; military; cohesion; masculinity; combat; homosocial	U.S. military policy Don't Ask Don't Tell (DADT) restricted integration of gays in the U.S. military based on the premise that knowledge of gay peers would decrease interpersonal bonds among unit members. Despite the heated debate over DADT, this social cohesion thesis, reflecting the tensions of homosocial desire, has not been tested empirically. The Israeli military provides an operative case-s…	x	SUR
J	Schlesinger, M; Heldman, C	Gender gap or gender gaps? New perspectives on support for government action and policies	2001	JOURNAL OF POLITICS		This paper clarifies the theoretical bases for expecting women to be more supportive of government programs than are men. We identify several factors not developed in past literature: (1) differences in emotional responses to social problems, (2) gendered differences in the awareness of those problems among one's own kin, (3) differences in the perceived fairness of existing social institutions, …	PPR	SUR
J	Goldgeier, JM; Tetlock, PE	Psychology and international relations theory	2001	ANNUAL REVIEW OF POLITICAL SCIENCE	error and bias; tradeoff reasoning; prospect theory; accountability pressures; internalization	Organized around several major theoretical traditions in international relations, this essay suggests which literature in psychology should be of greatest interest to different kinds of international relations scholars. New work in cognitive social psychology and behavioral decision theory simultaneously expands on and qualifies earlier error-and-bias portraits of the foreign policy maker, thereb…	ATT	CON
J	Masters, RD	Biology and politics: Linking nature and nurture	2001	ANNUAL REVIEW OF POLITICAL SCIENCE	environmental toxins; learning disabilities; crime; public water supplies; political theory	Although millions of Americans take psychoactive medicines (e.g. Prozac and Ritalin), few social scientists believe biological theories and findings should be integrated with research on human behavior. Four topics illustrate current studies linking politics and the life sciences: (a) Developments in genetics and medicine indicate that governmental policies have greatly underrated the dangers pos…	x	x
J	Raviv, A; Sadeh, A; Raviv, A; Silberstein, O	The reaction of the youth in Israel to the assassination of Prime Minister Yitzhak Rabin	1998	POLITICAL PSYCHOLOGY	adolescent bereavement; group identity; political violence; political orientation; Rabin's assassination	The assassination of Israeli Prime Minister Yitzhak Rabin by a political assassin caused shock disbelief and deep grief to the Israeli people, Particularly prominent was the reaction of the youth, who gathered in large crowds, at the site of the murder and in other places, and engaged in various mourning behaviors of a ritual nature. This drew the attention of the media in Israel and around the w…	x	SUR
J	Deshpande, Pia; Blatte, Scott; Margalit, Yonatan; Lezama, Carolina Olea; Schaffner, Brian F.; Shivakumar, Aadhya; Wingens, David	Critical Race Theory and Asymmetric Mobilization	2024	POLITICAL BEHAVIOR	Critical race theory; Mobilization; Partisanship; Campaigns; Elections	Teaching Critical Race Theory (CRT) in schools quickly became a salient issue nationally and in local elections despite CRT's origins as an academic theory. In this paper, we argue that elite asymmetries regarding the importance of CRT spillover to the electorate. We show that Republican legislators and conservative media's use of the term critical race theory dwarfed that of Democratic legislato…	x	SUR
J	Doces, John A.; M. Wolaver, Amy	Rationality and Risk: Experimental Evidence from Cote d'Ivoire	2022	POLITICAL PSYCHOLOGY	rationality; dual‐ process theory; experimental research	Do the cognitive biases established in WEIRD populations also exist in other populations? We test the implications of dual-process theory by varying experimental scenarios between those hypothesized to produce different levels of emotional response within a developing-country context. We hypothesize that respondents in an African setting will exhibit rational responses to questions about disease …	BEHAV	SUR
J	Gervais, Bryan T.; Evans, Heather K.; Russell, Annelise	Tweeting for Hearts and Minds? Measuring Candidates' Use of Anxiety in Tweets During the 2018 Midterm Elections	2020	PS-POLITICAL SCIENCE & POLITICS		This article considers whether candidates strategically use emotional rhetoric in social media messages similar to the way that fear appeals are used strategically in televised campaign advertisements. We use a dataset of tweets issued by the campaign accounts of candidates for the US House of Representatives during the last two months of the 2018 midterm elections to determine whether candidate …	PCOMM	QCA
J	Ward, George	Happiness and Voting: Evidence from Four Decades of Elections in Europe	2020	AMERICAN JOURNAL OF POLITICAL SCIENCE		There is a growing interest among policy makers in the use of subjective well-being (or happiness) data to measure societal progress, as well as to inform and evaluate public policy. Yet despite a sharp rise in the supply of well-being-based policymaking, it remains unclear whether there is any electoral demand for it. In this article, I study a long-run panel of general elections in Europe and f…	BEHAV	x
J	Gormley, William T., Jr.; Phillips, Deborah; Adelstein, Shirley; Shaw, Catherine	Head Start's Comparative Advantage: Myth or Reality?	2010	POLICY STUDIES JOURNAL		In recent years, Head Start's prominent role in preparing low-income 4-year-olds for school has been affected by rapid growth in state-funded pre-K programs, some of which are based in public schools. This has led to questions about the comparative advantages of these two approaches to early education. An analysis of data from Tulsa, Oklahoma, indicates that the school-based pre-K program is more…	x	x
J	Taylor, Laura K.; Merrilees, Christine E.; Goeke-Morey, Marcie C.; Shirlow, Pete; Cummings, E. Mark	Who is building peace? A latent class analysis of youth peacebuilders in a conflict-affected setting	2024	POLITICAL PSYCHOLOGY	adolescents; intergroup conflict; latent class analysis; peacebuilding; prosocial action; youth	Rebuilding society in the wake of conflict often falls on the generation born in peace. Yet, youth contributions to peacebuilding are often overlooked. This article challenges the narrative that sidelines the constructive contributions of young people in conflict-affected settings. Instead, we identify different kinds of youth peacebuilders. Using a person-centered approach, we conduct a latent c…	x	x
J	Stefanelli, Alberto; Meuleman, Bart; Abts, Koen	The ontological core of political radicalism. Exploring the role of antagonist, dogmatic, and populist beliefs in structuring radical ideologies	2024	CONTEMPORARY POLITICS	Populism; belief systems; radicalism; vote choice; latent class analysis	Scholars have extensively explored the ideological stances of radical individuals, often concentrating on voting and policy preferences. This paper seeks to identify the foundational elements-such as antagonism, dogmatism, and populism-that constitute the ontological core of radical belief systems and gauge their prevalence in the general population. Utilizing data from the 2019 Belgian National …	x	x
J	Madarova, Zuzana; Hardos, Pavol	In the Name of the Conservative People: Slovakia's Gendered Illiberal Transformation	2022	POLITICS AND GOVERNANCE	anti-gender politics; gender; illiberalism; populism; Slovakia	Over the past decade, Slovakia has witnessed the dismantling of public human rights institutions and gender equality policies and incessant efforts to limit sexual and reproductive rights. While these processes have been mostly discussed in relation to the transnational anti-gender movement, this article conceptualizes them as part of an illiberal turn. We argue that recent rhetorical, institutio…	x	QCA; DISC
J	Mutz, Diana C.	(MIS)ATTRIBUTING THE CAUSES OF AMERICAN JOB LOSS THE CONSEQUENCES OF GETTING IT WRONG	2021	PUBLIC OPINION QUARTERLY		What difference does it make if people attribute the loss of manufacturing jobs to trade as opposed to automation? Attributions of responsibility for social problems help shape mass opinion. In this study I use two experiments, including one nationally representative probability survey-experiment, to examine the consequences of attributing job loss to trade versus automation. Findings suggest tha…	x	SUR
J	Pickup, Mark; Kimbrough, Erik O.; de Rooij, Eline A.	Expressive Politics as (Costly) Norm Following	2022	POLITICAL BEHAVIOR	Political identities; Social identity theory; Social norms; Expressive politics; Political decision-making	When deciding whether to support a political candidate, policy or cause, individuals are observed to prioritize the expression of their political identities. They even knowingly incur personal costs (a lower wage, strained family relations) to do so. We argue that viewing political identities as social identities that impart norms on who or what one ought to support can help explain such costly p…	x	SUR
J	Demaziere, Didier	Job search success among the formerly-unemployed: paradoxically, a matter of self-discipline	2021	CRITICAL POLICY STUDIES	Getting a job; experience; institutional standards; job search; self-discipline; unemployed people	When activation is an essential cog in public policies, looking for a job is top priority for the jobless, and becomes their professional occupation. Job search experience is studied here in the light of the institutional norms and prescriptions that frame it. Our fieldwork has focused on the supposed correspondence between these two, since our interviewees were formerly-unemployed people who hav…	x	INT
J	Prohaska, Ariane	Still struggling: intersectionality, vulnerability, and long-term recovery after the Tuscaloosa, Alabama USA Tornado	2020	CRITICAL POLICY STUDIES	Natural disasters; social vulnerability; intersectionality; experiences of recovery; social stress	This research explores the impact of the Tuscaloosa tornado on the long-term financial and emotional well-being of survivors 4 to 5 years after the event. Using social stress theory and an intersectional analytic approach, this research utilizes in-depth interviews to assess the recovery experiences of survivors. Findings reveal that the tornado resulted in qualitatively different emotional and f…	x	INT
J	Smith-Carrier, Tracy	'The (charitable) pantry is bare': a critical discourse analysis of Christmas food hamper programs in Canada	2021	CRITICAL POLICY STUDIES	Basic income; critical discourse analysis; food charity; food insecurity; human rights; poverty	At all times, but especially during the Christmas season, Canada's reliance on the charitable food sector is markedly apparent. This paper examines, using the Discourse-Historical Approach (DHA) of Critical Discourse Analysis (CDA), the historical, contextual, referential and discursive themes emerging in major news stories about the provision and receipt of Christmas food hampers in Canada. Seve…	x	DISC
J	Bankert, Alexa; Huddy, Leonie; Rosema, Martin	Measuring Partisanship as a Social Identity in Multi-Party Systems	2017	POLITICAL BEHAVIOR	Partisanship; Political participation; Social identity; Latent trait; Scale measurement	There is no doubt that partisanship is a powerful influence on democratic political behavior. But there is also a lively debate on its nature and origins: Is it largely instrumental in nature and shaped by party performance and issues stances? Or is it basically a long-standing expressive identity reinforced by motivated reasoning and strong emotions? We assess the nature of partisanship in the E…	BEHAV	SUR
J	Lucas, Todd; Rudolph, Cort; Zhdanova, Ludmila; Barkho, Evone; Weidner, Nathan	Distributive Justice for Others, Collective Angst, and Support for Exclusion of Immigrants	2014	POLITICAL PSYCHOLOGY	justice; immigration; policing; distributive justice; procedural justice; belief in a just world; collective angst; SB1070; social identity; social value orientation	Harsh treatment of others can reflect an underlying motivation to view the world as fair and just and also a dispositional tendency to believe in justice. However, there is a critical need to refine and expand existing knowledge, not only to identify underlying psychological processes but also to better understand how justice may be implicated in support for exclusionary policies. Across two stud…	PPR	SUR
J	Kriner, Douglas L.; Shen, Francis X.	How Citizens Respond to Combat Casualties The Differential Impact of Local Casualties on Support for the War in Afghanistan	2012	PUBLIC OPINION QUARTERLY		Scholars have long analyzed the influence of combat casualties on public support for war. However, the mechanisms through which casualtiesparticularly local casualtiesaffect wartime opinion formation have received much less attention. We employ a novel survey experiment to test three mechanisms that might explain previously observed cleavages in war support between residents of high- and low-casu…	x	SUR
J	Schonhardt-Bailey, Cheryl	The congressional debate on Partial-Birth Abortion: Constitutional gravitas and moral passion	2008	BRITISH JOURNAL OF POLITICAL SCIENCE		Automated content analysis is employed to measure the dimensionality of Senate debates on the 2003 Partial-Birth Abortion Ban Act and compare these results with the final vote. The underlying verbal conflict leading up to the final roll-call vote contains two important dimensions: (1) an emotive battle over the abortion procedure itself, and (2) the battle over the constitutionality of the bill. …	PCOMM	QTA
J	Ram, BL; Hou, F	Changes in family structure and child outcomes: Roles of economic and familial resources	2003	POLICY STUDIES JOURNAL		This article examines the affects of changes in family structure (from a family with two original parents to a lone-parent family or a stepfamily) on emotional-behavioral and cognitive outcomes of young children. We use data from three cycles of the National Longitudinal Surveys of Children and Youth,first conducted in 1994-95, and every, 2 Years since then. The present analysis is based on data …	x	SUR
J	Denny, Elaine K.; Dow, David; Levy, Gabriella; Villamizar-Chaparro, Mateo	Extortion, Civic Action, and Political Participation among Guatemalan Deportees	2024	BRITISH JOURNAL OF POLITICAL SCIENCE	deported migrants; political participation; extortion; migration; Guatemala; D72; D74; O15	How do deported migrants engage in civic and political life after being forcibly returned to their home countries? Do experiences during the migration journey impact how deportees (re)engage? We explore how extortion experienced during migration alters political and civic engagement preferences. We utilize a multi-method approach combining original survey data of Guatemalans deported from the Uni…	x	SUR; INT
J	Dow, David A. A.; Levy, Gabriella; Romero, Diego; Tellez, Juan Fernando	State Absence, Vengeance, and the Logic of Vigilantism in Guatemala	2024	COMPARATIVE POLITICAL STUDIES	vigilantism; crime; attitudes; experiments	Across the world, citizens sidestep the state to punish offenses on their own. Such vigilantism can help communities provide order, yet it raises concerns about public accountability and the rights of the accused. While prior research has identified the structural correlates of vigilantism, an open question is in which cases citizens prefer vigilantism over conventional policing. To make sense of…	x	SUR
J	Jardina, Ashley; Piston, Spencer	The Politics of Racist Dehumanization in the United States	2023	ANNUAL REVIEW OF POLITICAL SCIENCE	dehumanization; race; racism; prejudice; racial attitudes; Black; Indigenous; white	The concept of racist dehumanization is essential for political scientists who seek to understand the nature, scope, and consequences of white racial prejudice in the United States today. Racist dehumanization consists of a variety of processes that construct, refashion, and maintain race by coding some people as white and therefore fully human and others as other than white and therefore less th…	x	META
J	Macdonald, Maggie; Russell, Annelise; Hua, Whitney	Negative Sentiment and Congressional Cue-Taking on Social Media	2023	PS-POLITICAL SCIENCE & POLITICS		Congressional candidates regularly turn their frustration into posts on Facebook, fueling extreme partisanship and echo-chamber dialogue with their negative sentiment. In this research, we provide new evidence demonstrating the power of that negative sentiment to elicit more user engagement on Facebook across various metrics, illustrating how congressional candidates' use of negativity correspond…	PCOMM	QCA
J	Goidel, Kirby; Gaddie, Keith; Goidel, Spencer	Rigged-Election Rhetoric: Coverage and Consequences	2019	PS-POLITICAL SCIENCE & POLITICS		Using content analysis and original survey data, we investigated the news coverage and consequences of Donald Trump's rigged-election claims during the 2016 presidential election. We added to previous literature by showing that the effects of such claims were highly contingent on individual partisan affiliation. Republicans and Independents who believed that the elections were rigged via voter fr…	x	QCA
J	Van Dalen, Arjen; De Vreese, Claes H.; AlBaek, Erik	MEDIATED UNCERTAINTY THE NEGATIVE IMPACT OF UNCERTAINTY IN ECONOMIC NEWS ON CONSUMER CONFIDENCE	2017	PUBLIC OPINION QUARTERLY		A growing body of research shows that uncertainty affects individual perceptions and preferences. However, we still know little about how uncertainty in news content affects public opinion formation. Building upon literature on the processing of uncertain information and prospect theory, we argue that uncertainty in the news lowers public expectations and fosters pessimism. A time-series analysis…	x	QTA
J	Ryan, Timothy J.	Reconsidering Moral Issues in Politics	2014	JOURNAL OF POLITICS		Political scientists commonly distinguish issues that are moral from ones that are not. The distinction is taken to be important for understanding persuadability, the stability of opinions, and issue salience, among other phenomena, but there are inconsistencies in how scholars have conceived it. Drawing insights from psychology, I suggest that it is fruitful to think about moral conviction as a …	BEHAV	SUR
	Aaroe, Lene; Petersen, Michael Bang; Arceneaux, Kevin	The Behavioral Immune System Shapes Political Intuitions: Why and How Individual Differences in Disgust Sensitivity Underlie Opposition to Immigration	2017	AMERICAN POLITICAL SCIENCE REVIEW		We present, test, and extend a theoretical framework that connects disgust, a powerful basic human emotion, to political attitudes through psychological mechanisms designed to protect humans from disease. These mechanisms work outside of conscious awareness, and in modern environments, they can motivate individuals to avoid intergroup contact by opposing immigration. We report a meta-analysis of …	ATT	SUR
	Andsager, Julie L.	How Interest Groups Attempt to Shape Public Opinion with Competing News Frames	2000	J & MC Quaterly			PCOMM	QTA
	Anghel, Veronica; Schulte-cloos, Julia	COVID-19-related anxieties do not decrease support for liberal democracy	2023	EUROPEAN JOURNAL OF POLITICAL RESEARCH		The COVID-19 pandemic led to widespread fear among the population. Early studies suggested that this resulted in exclusionary attitudes and increased support for discriminatory policy measures. We still lack an understanding of the longer-term, potentially erosive consequences that COVID-19-specific anxieties may carry for citizens' commitment to liberal democratic norms. In this research note, w…	ATT; PPR	EXP
	Brader, Ted; Valentino, Nicholas A.; Suhay, Elizabeth	What triggers public opposition to immigration? Anxiety, group cues, and immigration threat	2008	AMERICAN JOURNAL OF POLITICAL SCIENCE		We examine whether and how elite discourse shapes mass opinion and action on immigration policy. One popular but untested suspicion is that reactions to news about the costs of immigration depend upon who the immigrants are. We confirm this suspicion in a nationally representative experiment: news about the costs of immigration boosts white opposition far more when Latino immigrants, rather than …	PPR; BEHAV	EXP
	Breton, Charles; Eady, Gregory	Does International Terrorism Affect Public Attitudes toward Refugees? Evidence from a Large-Scale Natural Experiment	2022	JOURNAL OF POLITICS		Does international terrorism affect attitudes toward refugees? Does terrorism mobilize the public to pressure legislators to restrict refugee policy? Are these effects long- or short-lived? To answer these questions, this article presents results from a large-scale natural experiment to investigate the effects of the 2015 Islamic State terrorist attacks in Paris on attitudes toward Syrian refugee…	Z	SUR; EXP
	Clifford, S.	How Emotional Frames Moralize and Polarize Political Attitudes	2018	POLITICAL PSYCHOLOGY			PCOMM	EXP
	Clifford, Scott; Jerit, Jennifer	Disgust, Anxiety, and Political Learning in the Face of Threat	2018	AMERICAN JOURNAL OF POLITICAL SCIENCE		Emotions feature prominently in political rhetoric and media frames, and they have potent effects on how people process information. Yet, existing research has largely overlooked the influence of disgust, which is a basic emotion that leads people to avoid contamination threats. We illustrate how disgust may impede learning, as compared to the more commonly studied emotion of anxiety. Disgust and…	BEHAV	EXP
	de Kadt, Daniel	Voting Then, Voting Now: The Long-Term Consequences of Participation in South Africa's First Democratic Election	2017	JOURNAL OF POLITICS		In a developing democracy, can elections change the behavior of participating citizens? I study the effect of voting in South Africa's first democratic election in 1994 on future voting and present evidence of the lasting behavioral effects of past participation. Eligibility to participate in 1994 affects future voting by 3 percentage points, with an average treatment effect of actually voting be…	VOT	SUR
	Druckman, James N.	A Framework for the Study of Persuasion	2022	ANNUAL REVIEW OF POLITICAL SCIENCE		Persuasion is a vital part of politics-who wins elections and policy disputes often depends on which side can persuade more people. Given this centrality, the study of persuasion has a long history with an enormous number of theories and empirical inquiries. However, the literature is fragmented, with few generalizable findings. I unify previously disparate dimensions of this topic by presenting …	PCOMM	CON
	Filsinger, Maximilian; Hofstetter, Nathalie; Freitag, Markus	The emotional fabric of populism during a public health crisis: How anger shapes the relationship between pandemic threat and populist attitudes	2023	EUROPEAN POLITICAL SCIENCE REVIEW		While conventional wisdom connects crises and external threats to increasing support for populism, several questions remain unanswered. Following insights of affective intelligence theory (AIT), we posit that anger and fear elicited by pandemic threat relate differently to populist attitudes. While such relations have already been explored in the context of other hazards (such as financial turmoi…	ATT	SUR
	Fullerton, Allegra H.; Weible, Christopher M.	Examining emotional belief expressions of advocacy coalitions in Arkansas' gender identity politics	2024	POLICY STUDIES JOURNAL		Many theories and approaches to policy studies have recently begun to question and research how emotions interact with peoples' understanding and behaviors, especially in policy and politics. This paper builds on and contributes to studying emotions in policy and politics via the advocacy coalition framework (ACF). In applying Emotional-Belief Analysis, this paper examines the legislative testimo…	PCOMM	DISC
	Funck, A. S. & Lau, R. R.	A Meta-Analytic Assessment of the Effects of Emotions on Political Information Search and Decision-Making	2023	AMERICAN JOURNAL OF POLITICAL SCIENCE			THE; BEHAV	META
	Gabehart, Kayla M. M.; Fullerton, Allegra H. H.; Crawford, Anna M. M.; Weible, Christopher M. M.	How are emotions and beliefs expressed in legislative testimonies? An advocacy coalition approach	2023	REVIEW OF POLICY RESEARCH		While emotions are an inherent component of the human experience that influence behavior, values, and beliefs, they have largely been left out of policy process studies theoretically and methodologically. Using the Advocacy Coalition Framework (ACF), with its focus on how individuals coalesce into coalitions around a set of common beliefs, we begin to situate emotions as a critical component of b…	PCOMM	DISC
	Gadarian, Shana Kushner	The Politics of Threat: How Terrorism News Shapes Foreign Policy Attitudes	2010	JOURNAL OF POLITICS		In this paper, I argue that the features of the media environment after 9/11, particularly the media's emphasis on threatening information and evocative imagery, increased the public's probability of supporting the policies advocated by political leaders, principally the president. Using the National Election Studies 2000-2004 panel and a controlled, randomized experiment, I demonstrate that citi…	PPR	EXP; SUR
	Gubler, Joshua R.; Karpowitz, Christopher F.; Monson, J. Quin; Romney, David A.; South, Mikle	Changing Hearts and Minds? Why Media Messages Designed to Foster Empathy Often Fail	2022	JOURNAL OF POLITICS		Politicians and social activists frequently employ media designed to change hearts and minds by humanizing out-groups. These messages, it is assumed, lead to empathic concern, which motivates individuals to reconsider punitive policy attitudes. How effective is this approach? Using two experiments, we find that while media messages humanized Latinos for all respondents, the treatment messages pro…	PPR	EXP; SUR
	Hrbkova, Lenka; Kudrnac, Ales	Fear, trust, and compliance with COVID-19 measures: a study of the mediating effect of trust in government on the relationship between fear and compliance	2024	JOURNAL OF PUBLIC POLICY		As the COVID-19 pandemic became an unprecedented global threat, it was accompanied by an increase in trust in governments as well as fear among the public. Previous research suggests that both institutional trust and fear contribute to the willingness of citizens to comply with anti-pandemic measures. Moreover, fear during the contagion also increases trust in government. This article presents a …	BEHAV	SUR
	Huddy, Leonie; Mason, Lilliana; Aaroe, Lene	Expressive Partisanship: Campaign Involvement, Political Emotion, and Partisan Identity	2015	AMERICAN POLITICAL SCIENCE REVIEW		Party identification is central to the study of American political behavior, yet there remains disagreement over whether it is largely instrumental or expressive in nature. We draw on social identity theory to develop the expressive model and conduct four studies to compare it to an instrumental explanation of campaign involvement. We find strong support for the expressive model: a multi-item par…	Z	EXP; SUR
	Jung, Jae-Hee	The Mobilizing Effect of Parties' Moral Rhetoric	2020	AMERICAN JOURNAL OF POLITICAL SCIENCE		How does parties' use of moral rhetoric affect voter behavior? Prior comparative party research has studied party positions without much attention to how parties explain and justify their positions. Drawing insights from political and moral psychology, I argue that moral rhetoric mobilizes copartisan voters by activating positive emotions about their partisan preference. I expect this to hold amo…	PCOMM	SUR; QCA
	Kam, Cindy D.; Estes, Beth A.	Disgust Sensitivity and Public Demand for Protection	2016	JOURNAL OF POLITICS		We contribute to the growing literature on emotions and politics by focusing on the political relevance of disgust, a basic emotion characterized by visceral aversion to a potentially offensive stimulus. We offer a conceptual clarification of disgust's potential connection to politics, arguing that individual differences in sensitivity to feeling disgusted inform public demand for policies design…	PPR	SUR
	Kilty, Jennifer M.; Orsini, Michael	Emotions and anti-carceral advocacy in Canada: 'All of the anger this creates in our bodies is also a tool to kill us'	2024	POLICY AND POLITICS		Over the past three decades, Canada has expanded its capacity to confine citizens in ways that disproportionately affect Black, Indigenous and People of Colour (BIPOC) communities and people grappling with mental health and substance use issues, as well as poverty and homelessness. Carceral expansion, however, is not restricted to increasing institutional capacity; it also entails mechanisms to g…	PCOMM	INT
	Kosmidis, Spyros; Hobolt, Sara B.; Molloy, Eamonn; Whitefield, Stephen	Party Competition and Emotive Rhetoric	2019	COMPARATIVE POLITICAL STUDIES		When do parties use emotive rhetoric to appeal to voters? In this article, we argue that politicians are more likely to employ positive affect (valence) in their rhetoric to appeal to voters when parties are not ideologically distinct and when there is uncertainty about public preferences. To test these propositions, our article uses well-established psycholinguistic affect dictionaries to genera…	PCOMM	QCA
	Krotky, Jan	Fortress Europe is an insult to the values of the EU: The legitimation of migrant acceptance in the human security speech acts of Members of the European Parliament	2023	EUROPEAN POLICY ANALYSIS		Scholars agree that securitized discourses mainly drive migration policy. However, to fully understand the migration discourse, it is necessary to look also at the discourse legitimating the acceptance of migrants, refugees, and asylum seekers. Namely, how Members of the European Parliament (MEPs) legitimate the potential acceptance of migrants in EU plenary debates within the human security spee…	PCOMM	DISC
	Kupatadze, A.; Zeitzoff, T.	In the Shadow of Conflict: How Emotions, Threat Perceptions and Victimization Influence Foreign Policy Attitudes	2021	BRITISH JOURNAL OF POLITICAL SCIENCE		We investigate how emotions, threat perceptions and past violence influence foreign policy attitudes via a survey experiment in Georgia. Using a stratified sample across areas with differential exposure to the conflict and the presence of internally displaced persons, we randomly assign respondents to receive emotional primes about Russian aggression in the region. We find that exposure to violen…	PPR	SUR
	Legge, Jerome S., Jr.; Durant, Robert F.	Public Opinion, Risk Assessment, and Biotechnology: Lessons from Attitudes toward Genetically Modified Foods in the European Union	2010	REVIEW OF POLICY RESEARCH		Proponents of biotechnology argue that citizens' opposition to innovations such as genetically modified (GM) foods is rooted in emotionalism, media and nongovernmental organizations' distortions of good science, and scientific ignorance. Critics charge that this risk management discursive is too reductionist, exaggerates scientific capacity, inappropriately privileges scientific values over socia…	x	SUR
	MacKuen, M., Wolak, J., Keele, L. & Marcus, G. E.	Civic Engagements: Resolute Partisanship or Reflective Deliberation	2010	AMERICAN JOURNAL OF POLITICAL SCIENCE			BEHAV	EXP
	Maor, M. & Capelos, T.	Symposium: Affect and emotions in policy dynamics	2023	Policy Sciences			THE	META
	Marcus, George E.; McKuen, Michael; Neuman, Russell	Parsimony and Complexity: Developing and Testing Theories of Affective Intelligence	2011	POLITICAL PSYCHOLOGY			BEHAV	SUR
	Masterson, Michael	Humiliation and International Conflict Preferences	2022	JOURNAL OF POLITICS		Politicians and scholars often link humiliation to decisions to initiate and escalate international military conflict, yet the microfoundations underlying this link are undertheorized and untested. Can emotions, like humiliation, actually affect international bargaining? If so, through what mechanisms does humiliation operate? Drawing on studies in neuroscience and experimental psychology, this a…	BEHAV	SUR
	McBeth, Mark K.; Lybecker, Donna L.	The Narrative Policy Framework, Agendas, and Sanctuary Cities: The Construction of a Public Problem	2018	POLICY STUDIES JOURNAL		In this paper, we utilize narratives about sanctuary cities as an exploratory case study to suggest further development of the Narrative Policy Framework (NPF). We propose the inclusion of elements from the Multiple Streams Approach (MSA)-the ideas of focusing events, evidence, policy entrepreneurs, timing, policy windows-and the general agenda setting literature's concept of translation of narra…	PCOMM	CON
	Nja, Ove; Solberg, Oivind	Safety Considerations in Political Decisions: A Case Study of Changes to the Norwegian Aviation System	2010	REVIEW OF POLICY RESEARCH		Following the international deregulation act of 1994, the structure of the Norwegian aviation system has undergone several important changes. This paper describes the terms dictated by the political environment and the different administrations for implementing the changes. Our analysis addresses the inclusion of safety considerations in the specific decisions, and questions whether safety evalua…	x	CAS
	Peterson, Holly L. L.; Zanocco, Chad	Presidential stories of fear: Focusing congressional climate change mitigation attention in the United States	2023	REVIEW OF POLICY RESEARCH		Do presidential climate change narratives increase related congressional attention in the United States? Narrative theory says since narratives leverage cognitive heuristics, they should focus policy-making attention in institutions more efficiently than non-narrative statements. This study identifies and tests climate change statements and narratives, including those focused on solutions, or sto…	PCOMM	QTA
	Phillips, Joseph B.; Plutzer, Eric	Reassessing the Effects of Emotions on Turnout	2023	JOURNAL OF POLITICS		Discrete emotions such as anger, pride, worry, and hopefulness have been shown to predict candidate preferences, issue attitudes, reports of participation other than voting, and stated intention to participate in various civic and electoral activities. Yet we know very little about how emotions might affect the most fundamental individual act in a democracy: turning out to vote. Using original su…	VOT	SUR
	Pierce, Jonathan J.; Miller-Stevens, Katrina; Hicks, Isabel; Zilly, Dova Castaneda; Rangaraj, Saigpoal; Rao, Evan	How anger and fear influence policy narratives: Advocacy and regulation of oil and gas drilling in Colorado(sic)(sic)(sic)Palabras Clave	2024	REVIEW OF POLICY RESEARCH		When advocating for policy change, coalitions rely on various elements and strategies of policy narratives, including emotions. However, past research on the Narrative Policy Framework, and more broadly on the policy process, has largely ignored the role of emotions. This paper argues that emotions, such as anger and fear, are central to how coalitions advocate for policy change. It explores the …	PCOMM	QTA
	Seaton, Katherine; Wu, H. Denis	Making war and peace with emotion: Examining the Iraq and Iran cases via presidential speech and media coverage	2023	INTERNATIONAL POLITICAL SCIENCE REVIEW		This study investigates emotions conveyed in US presidential speeches and media coverage regarding the Iraq War and the Iran nuclear deal during 2003 and 2015. The researchers gathered and examined news stories about the two policies, all official speeches delivered by George W Bush and Barack Obama, and opinion polls conducted during the respective six-month period in those two years. Nine discr…	PCOMM	QCA
	Simas, Elizabeth N.; Clifford, Scott; Kirkland, Justin H.	How Empathic Concern Fuels Political Polarization	2020	AMERICAN POLITICAL SCIENCE REVIEW		Over the past two decades, there has been a marked increase in partisan social polarization, leaving scholars in search of solutions to partisan conflict. The psychology of intergroup relations identifies empathy as one of the key mechanisms that reduces intergroup conflict, and some have suggested that a lack of empathy has contributed to partisan polarization. Yet, empathy may not always live u…	BEHAV	SUR
	Simmons, Beth A.; Shaffer, Robert	Border Anxiety in International Discourse	2024	AMERICAN JOURNAL OF POLITICAL SCIENCE		International borders have become a growing security concern in many parts of the world. Porous borders have raised concerns about a host of external threats-real and imagined-that in turn potentially inform policy decisions about border security. We examine global official discourse and show that border discourse has become more frequent, localized, non-state-centric, and negative over time. How…	PCOMM; THE	DISC
	Valentino, Nicholas A.; Brader, Ted; Groenendyk, Eric W.; Gregorowicz, Krysha; Hutchings, Vincent L.	Election Night's Alright for Fighting: The Role of Emotions in Political Participation	2011	JOURNAL OF POLITICS		A large literature has established a persistent association between the skills and resources citizens possess and their likelihood of participating in politics. However, the short-term motivational forces that cause citizens to employ those skills and expend resources in one election but not the next have only recently received attention. Findings in political psychology suggest specific emotions…	BEHAV	EXP; SUR
	van Stokkom, B	Deliberative group dynamics: power, status and affect in interactive policy making	2005	POLICY AND POLITICS		Many proponents of interactive policy making view citizen consultations as a 'rational deliberation between equals'. Power, authority, rhetoric and emotions are considered to be obstructive factors. In this article it is argued that interactive policy settings are characterised by status and authority hierarchies and affect dynamics. First, two types of deliberative bodies are introduced: citizen…	x	CON
	Verhoeven, Imrat; Metze, Tamara	Heated policy: policy actors’ emotional storylines and conflict escalation	2022	Policy Sciences			PCOMM	CAS
	Versteegen, Peter Luca	Those were the what? Contents of nostalgia, relative deprivation and radical right support	2024	EUROPEAN JOURNAL OF POLITICAL RESEARCH		Recent research suggests that emotions are a central motivation for radical right voting. One emotion that has gained particular interest is nostalgia: Radical right politicians use nostalgic rhetoric, and feeling nostalgic is associated with radical right support. However, while nostalgia is widely and frequently experienced, previous work differentiates personal contents of nostalgia (e.g., chi…	VOT	SUR
	Vogeler, Colette S.; Schwindenhammer, Sandra; Gonglach, Denise; Bandelow, Nils C.	Agri-food technology politics: Exploring policy narratives in the European Parliament(sic)(sic)(sic)Palabras clave	2021	EUROPEAN POLICY ANALYSIS		The Narrative Policy Framework (NPF) highlights the role of arguments and emotions included in stories to influence the policy process. Most applications refer to highly politicized issues. How are narratives used in less politicized debates? This paper applies the NPF to two debates within the European Parliament (EP) which generally gain less public media attention than national debates. By con…	PCOMM	DISC
	Wamsler, Steffen; Freitag, Markus; Erhardt, Julian; Filsinger, Maximilian	The pandemic and the question of national belonging: Exposure to covid-19 threat and conceptions of nationhood	2023	EUROPEAN JOURNAL OF POLITICAL RESEARCH		Drawing on the behavioural immune system hypothesis, we argue that the prevalence of the Covid-19 pandemic threat in an individual's respective environment relates to exclusive, ethnic conceptions of nationhood. Referring to the affective intelligence theory, we maintain that specific negative emotions are prompted by the perception of being exposed to a pandemic threat, and these emotional state…	ATT	SUR
	Wang, Ching-Hsing	Why do people vote? Rationality or emotion	2013	INTERNATIONAL POLITICAL SCIENCE REVIEW		This study aims to examine the effects of rationality and emotion on voter turnout. By applying the empirical implications of a theoretical models framework, I outline the relationship between rationality, emotion, and turnout and propose two hypotheses about the effects of party differential and emotion differential on turnout. The empirical test using data from American National Election Studie…	VOT	SUR
	Webster, Steven W.; Albertson, Bethany	Emotion and Politics: Noncognitive Psychological Biases in Public Opinion	2022	ANNUAL REVIEW OF POLITICAL SCIENCE		Contemporary politics is noteworthy for its emotional character. Emotions shape and, in turn, are elicited by partisan polarization, public opinion, and political attitudes. In this article, we outline recent work in the field of emotion and politics with an emphasis on the relationship between emotion and polarization, issue attitudes, information processing, and views on democratic governance. …	THE	META
	Widmann, Tobias	Fear, Hope, and COVID-19: Emotional Elite Rhetoric and Its Impact on the Public During the First Wave of the COVID-19 Pandemic	2022	POLITICAL PSYCHOLOGY		Research shows that emotions matter in politics, and they matter during a public health crisis. Yet, a comprehensive analysis of emotional political rhetoric during the COVID-19 crisis is still missing. Based on parties' position in the political arena (government versus populist radical parties), I expect differences in how specific emotions are employed and in how these messages actually influe…	PCOMM	QTA
	Schumacher, Gijs; Rooduijn, Matthijs; Bakker, Bert N.	Hot Populism? Affective Responses to Antiestablishment Rhetoric	2022	POLITICAL PSYCHOLOGY		Populist rhetoric is often portrayed as deeply emotional, aimed at provoking gut-level, affective responses. It clearly enthuses some voters, while other voters clearly resent it. Yet we know very little about the affective responses that populist rhetoric actually evokes. For whom is populist rhetoric, particularly its antiestablishment component, arousing, and who has positive or negative affec…	PCOMM	EXP
	Renström, Emma A.; Bäck, Hanna; Carroll, Royce	Threats, Emotions, and Affective Polarization	2023	POLITICAL PSYCHOLOGY		Why do some individuals feel hostility and express bias against supporters of other political parties? Drawing on intergroup threat theory, we examine the role of emotions as a mechanism by which perceived threats against the ingroup are a source of increased affective polarization. In two survey experiments performed in the multiparty contexts of Sweden (N = 505) and Germany (N = 776), we manipu…	BEHAV	SUR
	van Zomeren, Martijn	Toward an Integrative Perspective on Distinct Positive Emotions for Political Action: Analyzing, Comparing, Evaluating, and Synthesizing Three Theoretical Perspectives	2021	POLITICAL PSYCHOLOGY		Which emotions explain why people engage in political action (e.g., voting, protesting)? To answer this question, theory and research in psychology and political science predominantly focused on distinct negative emotions such as anger. The current article conceptually explores the motivational potential of distinct positive emotions by developing an integrative perspective that specifies which p…	THE; BEHAV	CON
	Civettini, Andrew J. W.; Redlawsk, David P.	Voters, Emotions, and Memory	2009	POLITICAL PSYCHOLOGY		In this paper we argue that emotional response to information encountered in campaigns has implications for the likelihood of remembering that information at the time of the vote. Most voting models are built on what voters remember-whether it is the placement of candidates on issues, or opened ended responses to prompts. That recall of memory is biased is well-known, but the extent to which thos…	VOT	EXP
	Arceneaux, Kevin; Van der Wielen, Ryan J.	The Effects of Need for Cognition and Need for Affect on Partisan Evaluations	2013	POLITICAL PSYCHOLOGY		The voting behavior literature has advanced two prominent theoretical models of partisanship: the social psychological and rational models. Implicit to both stylized models is the assumption that all partisans process information similarly. Yet, growing research in psychology suggests that individuals possess different motivations when evaluating information. We propose that the applicability of …	VOT	SUR
	De Castella, Krista; McGarty, Craig; Musgrove, Luke	Fear Appeals in Political Rhetoric about Terrorism: An Analysis of Speeches by Australian Prime Minister Howard	2009	POLITICAL PSYCHOLOGY		This paper explores fear-arousing content in Australian former Prime Minister John Howard's political rhetoric about terrorism. We coded 27 speeches delivered between September 2001 and November 2007 for the presence of statements promoting fear-consistent appraisals (Smith & Lazarus, 1993). Fear-arousing content was present in 24 of these speeches, but the amount of fear-arousing content varied …	PCOMM	QTA; QCA
	Jayme Montiel, Cristina; Uyheng, Joshua	Mapping Contentious Collective Emotions in a Populist Democracy: Duterte's Push for Philippine Federalism	2020	POLITICAL PSYCHOLOGY		This article analyzes collective emotions toward political change in a populist democracy. Taking the federalization of the Philippines led by President Rodrigo Duterte as an exemplar case, we extend prevailing scholarship which focuses on populist leaders' electoral discourse by examining the affective landscape of the populist public in a postelectoral context. Utilizing a sequential mixed-meth…	Z	QTA
	Lau, RR; Schlesinger, M	Policy frames, metaphorical reasoning, and support for public policies	2005	POLITICAL PSYCHOLOGY		This article evaluates the predictive value of a new theory for understanding public support for alternative solutions to policy problems, which we call policy metaphors. A policy metaphor represents a particular form of cognitive framing that makes use of commonly understood social institutions and judgments about their effectiveness to form archetypes against which proposed solutions to new pol…	PPR	SUR
	Ladd, Jonathan McDonald; Lenz, Gabriel S.	Reassessing the role of anxiety in vote choice	2008	POLITICAL PSYCHOLOGY		Much recent political psychology scholarship has examined the role of anxiety in vote choice. This work generally argues that anxiety affects vote choice indirectly by causing citizens to more thoroughly search for and process political information. This indirect effect of anxiety leads citizens to rely less on heuristics, such as party, and more on substantive information, such as policy positio…	VOT	SUR
	Small, Deborah A.; Lerner, Jennifer S.	Emotional policy: Personal sadness and anger shape judgments about a welfare case	2008	POLITICAL PSYCHOLOGY		When making decisions about a welfare case, it is reasonable for one's thoughts and feelings about the potential welfare recipient to influence the decision. It is less reasonable for one's incidental feelings (e.g., sadness or anger arising from an event in one's personal life) to influence such decisions. In two studies, however, data reveal that incidental anger and sadness do in fact carry ov…	PPR	EXP
	Brader, Ted	The Political Relevance of Emotions: Reassessing Revisited	2011	POLITICAL PSYCHOLOGY		Ladd and Lenz (2008) question a central claim of affective intelligence theory (AIT), namely that anxiety affects political judgments indirectly by reducing the role of predispositions and increasing the role of contemporary information. They claim that alternative hypotheses, especially the notion that emotions are simply rationalizations of political preferences, better explain the role of emot…	THE	META; CON
	Ladd, Jonathan McDonald; Lenz, Gabriel S.	Does Anxiety Improve Voters' Decision Making?	2011	POLITICAL PSYCHOLOGY		Affective Intelligence (AI) theory proposes to answer a fundamental question about democracy: how it succeeds even though most citizens pay little attention to politics. AI contends that, when circumstances generate sufficient anxiety, citizens make informed and thoughtful political decisions. In Ladd and Lenz (2008), we showed that two simpler depictions of anxiety's role can explain the vote in…	VOT	SUR
	Allamong, Maxwell B.; Peterson, David A. M.	Screw Those Guys: Polarization, Empathy, and Attitudes About Out-Partisans	2021	POLITICAL PSYCHOLOGY		Empathic ability is the ability to interpret the emotional state of others. In today's highly partisan and polarized environment, empathic ability may play a key role in determining how partisans respond emotionally to changes in public policy and those helped or harmed by the policy. Utilizing Baron-Cohen et al.'s (Journal of Child Psychology and Psychiatry, 42, 241-251, 2001) Reading the Mind i…	PPR; ATT	SUR
	Matthes, Joerg; Schmuck, Desiree; von Sikorski, Christian	Terror, Terror Everywhere? How Terrorism News Shape Support for Anti-Muslim Policies as a Function of Perceived Threat Severity and Controllability	2019	POLITICAL PSYCHOLOGY		Terrorist attacks committed by the so-called Islamic State are rising in Western countries. How the news media portray these attacks may crucially influence emotional responses and support for anti-Muslim policies such as immigration bans. Based on the Extended parallel response model (EPRM, Witte, 1992), we theorize that specific features of terrorism news such as threat severity (e.g., high vs.…	PCOMM; PPR	SUR
	Georgarakis, George N.	Yikes! The Effect of Incidental Disgust and Information on Public Attitudes During the COVID-19 Pandemic	2023	POLITICAL PSYCHOLOGY		Existing research has focused extensively on the role of emotions such as anger, fear, and enthusiasm in explaining public opinion, but less is known about the importance of disgust, an innate disease-related emotion. To study the independent and joint effects of disgust and information, I draw on the case of the COVID-19 pandemic. I demonstrate that experimentally induced incidental disgust and …	ATT; PPR	SUR
	Lau, Richard R.; Heldman, Caroline	Self-Interest, Symbolic Attitudes, and Support for Public Policy: A Multilevel Analysis	2009	POLITICAL PSYCHOLOGY		This paper examines the role of self-interest and symbolic attitudes as predictors of support for two domestic policy issues-guaranteed jobs and incomes and national health insurance-in the American National Election Survey (ANES) between 1972 and 2004. As was the case in 1976 when Sears, Lau, Tyler, and Allen (1980) first explored this topic, symbolic attitudes continue to be much more important…	PPR	SUR
	Feldman, Stanley; Huddy, Leonie; Wronski, Julie; Lown, Patrick	The Interplay of Empathy and Individualism in Support for Social Welfare Policies	2020	POLITICAL PSYCHOLOGY		Public support for government welfare programs is grounded in two potentially conflicting factors: a belief in individualism which undermines support for welfare assistance and the capacity for empathy which potentially enhances support. However, empathy is an expensive psychological commodity subject to pervasive up- and down-regulation. This article examines the degree to which a belief in indi…	PPR	SUR
	Vasilopoulos, Pavlos; Marcus, George E.; Foucault, Martial	Emotional Responses to the Charlie Hebdo Attacks: Addressing the Authoritarianism Puzzle	2018	POLITICAL PSYCHOLOGY		The finding that threat boosts the public's preferences for authoritarian policies has been well established in the research literature. Why this shift occurs remains open as the extant literature reports contradictory findings regarding the interaction of dispositions, such as conservatism and authoritarianism, with threat. One line of research argues that threat increases authoritarian preferen…	PPR	SUR
	Jardina, Ashley; Kalmoe, Nathan; Gross, Kimberly	Disavowing White Identity: How Social Disgust can Change Social Identities	2021	POLITICAL PSYCHOLOGY		Recent work finds that the sense of solidarity some whites feel with their racial group is strongly associated with their political attitudes, particularly since the election of Barack Obama. Prior work has also noted that levels of this identity have been stable across time and data sources. We, however, document a notable decline in levels of white identity in both panel and cross-sectional nat…	BEHAV	SUR
	Nussio, Enzo	Attitudinal and Emotional Consequences of Islamist Terrorism. Evidence from the Berlin Attack	2020	POLITICAL PSYCHOLOGY		Studies about Islamist-inspired terror attacks in the Western world have identified a recently declining impact on public opinion. What explains this development? I argue that the wider audience of terrorist attacks has become desensitized. Cognitive desensitization occurs when citizens increasingly expect an attack, reducing the likelihood of attitudinal change. Emotional desensitization occurs …	ATT	SUR
	Vasilopoulos, Pavlos; Marcus, George E.; Valentino, Nicholas A.; Foucault, Martial	Fear, Anger, and Voting for the Far Right: Evidence From the November 13, 2015 Paris Terror Attacks	2019	POLITICAL PSYCHOLOGY		The conjecture that negative emotions underpin support for far-right politics is common among pundits and scholars. The conventional account holds that authoritarian populists catalyze public anxiety about the changing social order and/or deteriorating national economic conditions, and this anxiety subsequently drives up support for the far right. We propose that while emotions do indeed play an …	VOT	SUR
